# Supplementary material
Source: publisher figshare collection journal article supplement (https://diabetesjournals.figshare.com/articles/dataset/_/19337210)

## Electronic Supplemental Material

### *Supplemental Materials*

**Urine proteomics LC-MS/MS details.**

**Follow-up study cohort blood and urine cathepsin D ELISA measurements.**

**Mouse proximal tubular epithelial cell culture and Akita mouse cathepsin D enzyme activity studies:**

reagents, cell culture, animal models, cathepsin D activity, total protein extractions from the mice kidney cortex, double label fluorescent immunohistochemistry, assessment of IL-1, IL-6, and KIM-1 levels, statistical analysis.

**References.**

### *Tables*

**Table S1.** Urine peptides measured in the JDRF Biomarkers Consortium across discovery and validation sets.

**Table S2.** Endogenous peptides monitored in the targeted proteomics assay.

**Table S3.** Distribution of JDRF cohorts by laboratory processing Subsets.

**Table S4.** Baseline characteristics of participants from cohorts used for follow-up cathepsin D serum and urine measurements.

**Table S5.** Associations of 38 urine peptides with rapid eGFR decline in the JDRF Biomarkers Consortium discovery set.

**Table S6.** Associations of 20 urine proteins with rapid eGFR decline in the JDRF Biomarkers Consortium discovery set.

**Table S7.** Associations of urine cathepsin D peptides and protein with rapid eGFR decline in the JDRF Biomarkers Consortium validation set.

**Table S8.** Associations of cathepsin D protein with rapid eGFR decline in the JDRF Biomarkers Consortium discovery set, sequentially adjusted for full covariate model variables.

**Table S9.** Associations of cathepsin D protein with rapid eGFR decline in the JDRF Biomarkers Consortium validation set, sequentially adjusted for full covariate model variables.

**Table S10.** Associations of cathepsin D peptides and protein with rapid eGFR decline in the discovery set, stratified by baseline UACR and eGFR.

**Table S11.** Associations of cathepsin D peptides and protein with rapid eGFR decline in the validation set, stratified by baseline UACR and eGFR.

**Table S12.** Associations between serum cathepsin D and histopathological features in the Boston Kidney Biopsy Cohort.

**Table S13.** Associations between urine creatinine-normalized cathepsin D and serum cathepsin D in follow-up analyses.

**Table S14.** Baseline characteristics of Pima Indian study cohort subjects with type 2 diabetes.

**Table S15.** Characteristics of Kidney Precision Medicine Project (KPMP) subjects with diabetes and chronic kidney disease used for cathepsin D single cell RNAseq kidney tissue measurements.

#### *Figures*

**Figure S1.** Cathepsin D activity in the media of MCT cells transfected with CatD-siRNA or Ctr-siRNA after 24 hours of treatment.

**Figure S2.** Cathepsin D follow-up cohort measurements.

**Figure S3.** Violin plots depicting cathepsin D (CTSD) mRNA expression levels across kidney cell types derived using single-cell RNA sequencing from Kidney Precision Medicine Project (KPMP) biopsy samples.

**Figure S4.** Cathepsin D, Akita mouse model studies

**Figure S5.** MCT cell inflammatory/injury marker studies.

## **Supplemental Materials**

### **Urine proteomics LC-MS/MS details**

Each aliquot of urine (0.2 mL) was supplemented with 1 µg of α-amylase from *Aspergillus oryzae* (10 µL of 0.1 µg/µL in phosphate buffered saline). Proteins were then precipitated by adding 0.8 mL ice-cold acidified acetone:methanol (50%:50% v:v; acidified acetone is made with 120 mL acetone and 24 µL of 5 M HCl in water), briefly vortexing, and incubating for exactly 24 h at -20°C. Proteins were pelleted for 15 min at 4°C and 15,000xg and then dried, first at room temperature and atmospheric pressure, and then under vacuum with a centrifugal evaporator (15 min at room temperature). The pellets were reconstituted in 100 µL freshly prepared 0.5% sodium deoxycholate in 50 mM ammonium bicarbonate in a Thermomixer (1000 rpm, 2 h at room temperature). The proteins were reduced in 5 mM dithiothreitol (1 µL of 0.5 M dithiothreitol) for 30 min at 60°C, alkylated in 15 mM iodoacetamide (3 µL of freshly prepared 0.5 M iodoacetamide) for 30 min at room temperature in the dark, and then digested with 1 µg trypsin (5 µL of 0.2 µg/µL Worthington Biomedical trypsin, Lakewood, NJ) for 2 h at 37°C with shaking (Thermomixer, 1400 rpm). Deoxycholate was precipitated by the addition of HCl to a final concentration of 200 mM (4.4 µL of 5 M HCl) and incubation at 4°C for 15 min and was pelleted by centrifuging at 4°C and 15,000xg for 20 min. The supernatant was removed, centrifuged again, and then desalted using solid phase extraction (HLB Prime µElute plate, Waters, Milford, MA) on a positive pressure manifold (Biotage). To desalt, samples were loaded onto the extraction plate, desalted 3 times with 100 µL 0.1% trifluoroacetic acid, followed by 100 µL 0.5% formic acid. Peptides were eluted 2 times with 100 µL of 80% acetonitrile/0.1% formic acid and dried in a centrifugal vacuum concentrator. The peptides were reconstituted in 30 µL 5% acetonitrile in 0.1% formic acid with vortexing (2 h at room temperature), spiked with internal standard peptides (30 µL internal standards in 0.1% formic acid), vortexed briefly, centrifuged for 10 min at room temperature (15,000xg), and then transferred to an injection vial (20 µL). Peptides of interest (see table \*\*) were quantified using LC-MS/MS on a Thermo Orbitrap mass spectrometer connected to an Easy-nLC liquid chromatography system (Thermo Scientific, Waltham, MA). Peptides were monitored by selecting their precursor ions in the isolation quadrupole (selection window 1.5 Da) and collecting full scan MS/MS after HCD fragmentation (NCE 27) in the Orbitrap analyzer using lowest resolution (17,500) setting to increase scan rate. Scheduled acquisition with five-minute acquisition windows were set up for each peptide precursor using Skyline software (MacCoss Laboratory, University of

Washington) allowing a maximum of 30 concurrent PRM experiments at any given time. Acquired data was processed in Skyline and automated integration was manually checked for each peptide chromatogram. Identity of the chromatographic peaks was ascertained by matching the PRM MS/MS spectrum to the spectra from a shotgun source dataset (dot product > 0.8 and mass precision < 5 ppm).

### **Follow-up study cohort details and blood and urine cathepsin D ELISA measurements**

Urine and serum cathepsin D measurements were performed in 96 adults with diabetes from the Boston Kidney Biopsy Cohort (n=56), the Healthy Kidney Study (HKS, n = 19), and a pilot Vitamin D trial in subjects with type 2 diabetes and microalbuminuria (n=21). The HKS is a cohort study based in Seattle beginning in 2004 following adults over a range of kidney functions with the goal of determining risk factors for kidney disease progression.<sup>1</sup> The pilot Vitamin D trial randomized adults with type 2 diabetes, eGFR  $\geq$  60ml/min/1.73m<sup>2</sup>, and UACR 30-300mg/g to 12 months of vitamin D<sub>3</sub> 2000 IU/day versus placebo.

Urine and serum cathepsin D measurements were performed with a commercially available Abcam enzyme-linked immunosorbent assay (ab119586; Cambridge, Massachusetts, USA). Urine samples were diluted 20-fold and serum samples were diluted 80-fold. For urine measurements, the mean intra- and inter-assay coefficients of variation (CV) were 17.2% and 15.0%, respectively. For serum measurements, the mean intra- and inter-assay CVs were 16.4% and 16.4%, respectively. Correlations between serum and urine cathepsin D were assessed using the Pearson method. The association between serum and urine cathepsin D was additionally evaluated using linear regression models adjusting for sex, age, eGFR, and log(UACR).

### **Mouse proximal tubular epithelial cell culture and Akita mouse cathepsin D enzyme activity studies**

**Reagents.** Unless otherwise stated, all chemicals were of reagent-grade quality and were purchased from Sigma Chemical Co. (St. Louis, MO). Cathepsin D substrate was purchased from ENZO (Farmingdale, NY). Rabbit polyclonal anti-cathepsin D, mouse monoclonal anti-LAMP1 antibody and mouse monoclonal anti-aquaporin 1 antibody were purchased from Abcam (ab75852, ab25630 and ab9566, respectively). Alexa Fluor 488 and 594 antibodies were purchased from ThermoFisher Scientific (Waltham, MA). VECTASHIELD® Antifade Mounting Medium with DAPI (Vector Laboratories, Burlingame, CA). siRNA and transfection

reagents DharmaFECT 1 were purchased from GE Healthcare Dharmacon (Lafayette, CO). IL1, IL6 and Kim1 ELISA kits were purchased from BioVision (Milpitas, CA). Pierce BCA protein assay kit from ThermoFisher Scientific (Waltham, MA). Other reagents for immunohistochemistry have been purchased from Agilent (Santa Clara, CA).

**Cell culture.** For the experiment we used MCT (murine kidney proximal tubular epithelial) cells which in culture express in vivo characteristics of proximal tubular epithelial cells.<sup>2</sup> MCT cells were maintained in Dulbecco's modified Eagle's medium containing 5 mM glucose (DMEM), 100 units/ml penicillin, 100 µg/ml streptomycin and 2 mM glutamine, plus 10% fetal bovine serum in a 5% CO<sub>2</sub> atmosphere at 37°C. Cells were used between passages 6 and 15. Before addition of agents and transfections, the medium was changed overnight to DMEM without FBS and antibiotics. To induce cathepsin D activity, cells were treated with 25 mM glucose, or AGE-modified BSA (100–200 µg/mL) or control BSA (100 µg/mL) with 5 mM glucose for 24 hours. AGE-BSA concentrations were chosen based on the previously published study.<sup>3</sup> For the following experiments 100 µg/mL of AGE-BSA were used as a minimal concentration which significantly induced CatD activity.

For the RNA interference experiments, a SMART-pool consisting of four short or small interfering RNA (siRNA) duplexes specific for mouse CatD was obtained from Dharmacon. The SMARTpool of siRNAs was introduced into the cells by transfection using DharmaFECT 1 according to the manufacture protocols. Scrambled (nontargeting) siRNAs served as controls to validate the specificity of the siRNAs. Scrambled control and siRNA for CatD were used at a concentration of 125 pmol/mL.

**Animal models.** Samples for the immunofluorescent staining and CatD activity were from a previously published study.<sup>4</sup> To generate the diabetic kidney disease mouse model, we bred C57BL/6-Ins2<sup>Akita</sup> male mice to female DBA/2 mice to produce F1(DBA/2 X C57BL/6)-Ins2<sup>Akita</sup> diabetic mice (F1 Akita mice). As a control we used offspring of a C57BL/6 male mated to female DBA/2 mice (F1[DBA/2 X C57BL/6] control mice). All mice were purchased from Jackson Laboratories. 16-week-old mice were used. Mice were fasted for 3 h prior to spontaneous urine or blood collection for Cat D activity analysis. Kidneys were fixed

in 4% formalin and embedded in paraffin for the next immunofluorescence microscopy. Part of kidney were frozen in the liquid nitrogen and stored at -80 °C and were used for the CatD activity.

**Cathepsin D activity** was measured by monitoring hydrolysis of the CatD-specific fluorogenic substrate, MCA-Gly-Lys-Pro-Ile-Leu-Phe-Phe-Arg-Leu-Lys(Dnp)-D-Arg-NH<sub>2</sub> in the 0.1 M acetate buffer with 10 mM DTT, pH=4.5.<sup>5</sup> Fluorescence of free aminomethyl coumarin was determined as a kinetic interval assay, with readings taken every 5 minutes for 3 hours at 30 °C by excitation at 328 nm and emission at 460 nm using Tecan Spark 10M fluorescent plate reader. Representative results were taken after one hour of reaction. Pepstatin A were used as controls to confirm the detection of specific activities. Absorbance in samples containing pepstatin A was subtracted from that in samples lacking pepstatin A.

**Double-label fluorescent immunohistochemistry** was assessed as described, with minor modifications.<sup>6</sup> The sections of kidney were deparaffinized in xylene, hydrated in decreasing concentrations of ethanol, and washed in water. For double fluorescent immunohistochemistry of the kidney cortex, anti-cathepsin D antibody was applied in combination with anti-aquaporin 1 antibody, both diluted 1:100 in 1% BSA in Tris-buffered solution (TBS) and applied overnight at 4 °C in the humidity chamber. After incubation with primary antibodies, all the sections were washed in PBS containing 0.01% Triton X-100. A cocktail of secondary Alexa Fluor 488 and 594 antibodies (both in 1:150 dilution) were applied for 2 h at room temperature. Then the sections were washed, coverslipped, and mounted with Prolong Gold Antifade Reagent with DAPI. At the least, 10 fields of each section were examined to select 1 representative image. To detect colocalization of Cathepsin D and LAMP1 (lysosomal marker), MCT cells were fixed in ethanol:methanol solution (50:50 v/v) for 15 min at -20 °C. Anti-cathepsin D antibody was applied in combination with anti-LAMP1 antibody, diluted 1:100 and 1:50, respectively, in 1% BSA in TBS and applied overnight at 4 °C in the humidity chamber. Next steps were performed similarly like mentioned above. Representative images were photographed using Axio Imager A1 microscope (Carl Zeiss, Melville, NY). The Adobe Photoshop CS6 program (Adobe Systems Inc., San Jose, CA) was used to merge the images. To verify specificity of all immunostainings, primary antibodies were omitted in negative controls.

**Total protein extractions from the mice kidney cortex** were obtained from liquid nitrogen powdered tissue and following buffer: 0.25 M sucrose, 1 mM MgCl<sub>2</sub>, 2 mM EGTA, 25 mM HEPES, pH 7.5 and protease inhibitor cocktail. CatD activity were measured in the cytosolic fraction after centrifugation at 40,000 rpm for 30 min at 4 °C. A Pierce BCA protein assay kit was used to quantify the protein concentration.

**Assessment of IL1, IL6 and Kim1 levels** were performed by using according ELISA kits. All procedures were performed according to the manufacture protocols. Briefly samples were incubated with capture antibody for 2 hours at room temperature, washed with followed by 2 hours of incubation with detection antibodies. After washing, streptavidin-HRP were applied for the next 20 min of incubation at room temperature. Color development reaction were performed with substrate solution for the 20 min of incubation at room temperature with next applying of sulfuric acid stop solution. Determination of optical density were performed by using Tecan Spark 10M microplate reader at 450 nm with correction at 570 nm. Obtained results were corrected to the total protein level in the cell medium. A Pierce BCA protein assay kit was used to quantify the protein concentration.

**Statistical analyses.** The results are expressed as mean ± SEM. Statistical analysis was based on Student's t-test for comparison of two groups and one-way analysis of variance for multiple group comparisons with the ANOVA. Significance was defined at P≤0.05.

## **References**

1. Jing J, Isoherranen N, Robinson-Cohen C, Petrie I, Kestenbaum BR, Yeung CK. Chronic Kidney Disease Alters Vitamin A Homeostasis via Effects on Hepatic RBP4 Protein Expression and Metabolic Enzymes. *Clin Transl Sci.* 2016;9(4):207-215. doi:10.1111/cts.12402

2. Haverty TP, Kelly CJ, Hines WH, Amenta PS, Watanabe M, Harper RA, Kefalides NA, and Neilson EG. Characterization of a renal tubular epithelial cell line which secretes the autologous target antigen of autoimmune experimental interstitial nephritis. *J Cell Biol* 107: 1359 –1368, 1988.
3. Liu WJ, Gan Y, Huang WF, Wu HL, Zhang XQ, Zheng HJ, Liu HF. Lysosome restoration to activate podocyte autophagy: a new therapeutic strategy for diabetic kidney disease. *Cell Death Dis.* 10:806. 2019.
4. You Y-H, Quach T, Saito R, Pham J, Sharma K. Metabolomics reveals a key role for fumarate in mediating the effects of NADPH oxidase 4 in diabetic kidney disease. *Journal of the American Society of Nephrology.* 2016;27(2):466–481.
5. Bestion E, Jilkova ZM, Mège JL, et al. GNS561 acts as a potent anti-fibrotic and pro-fibrolytic agent in liver fibrosis through TGF- $\beta$ 1 inhibition. *Ther Adv Chronic Dis.* 2020;11:2040622320942042. doi: 10.1177/2040622320942042. eCollection 2020.
6. Drel VR, Lupachyk S, Shevalye H, et al. New therapeutic and biomarker discovery for peripheral diabetic neuropathy: PARP Inhibitor, Nitrotyrosine, and Tumor Necrosis Factor- $\alpha$ . *Endocrinology.* 2010;151(6): 2547–2555.

## Supplemental Tables

**Table S1. Urine peptides measured in the JDRF Biomarkers Consortium across discovery and validation sets.** Data obtained from UniProt database.

| Protein Name | UniProt ID | Peptide Sequence   | Full Protein Name                            |
|--------------|------------|--------------------|----------------------------------------------|
| AQP2         | P41181     | SLAPAVVTGK         | Aquaporin-2                                  |
| CATD         | P07339     | VGFAEAAR           | Cathepsin D                                  |
| CATD         | P07339     | LSPEDYTLK          | Cathepsin D                                  |
| CNDP2        | Q96KP4     | EGGSIPVTLTTFQEATGK | Cytosolic non-specific dipeptidase 2         |
| CNDP2        | Q96KP4     | TGQEIPVNVR         | Cytosolic non-specific dipeptidase 2         |
| CO1A1        | P02452     | GEAGPQGPR          | Collagen alpha-1(I) chain                    |
| CO1A1        | P02452     | GSEGPQGVR          | Collagen alpha-1(I) chain                    |
| CO3A1        | P02461     | GPVGPSPGPGK        | Collagen alpha-1(III) chain                  |
| CO3A1        | P02461     | DGNPGSDGLPGR       | Collagen alpha-1(III) chain                  |
| CTGF         | P29279     | LPSPDCPFPR         | Connective tissue growth factor              |
| CTGF         | P29279     | DGAPCIFGGTVYR      | Connective tissue growth factor              |
| EGF          | P01133     | LGTAWCSCR          | Epidermal growth factor                      |
| EGF          | P01133     | AYIWVDLER          | Epidermal growth factor                      |
| EGF          | P01133     | EDDTWEPEQK         | Epidermal growth factor                      |
| ESAM         | Q96AP7     | DSGPYSCSVNVQDK     | Endothelial cell-selective adhesion molecule |
| ESAM         | Q96AP7     | SKPAVQYQWDR        | Endothelial cell-selective adhesion molecule |
| IBP2         | P18065     | LEGEACGVYTPR       | Insulin-like growth factor binding protein 2 |
| IBP2         | P18065     | EPGCGCCSVCAR       | Insulin-like growth factor binding protein 2 |
| IBP3         | P17936     | ALAQCAPPPAVCAELVR  | Insulin-like growth factor binding protein 3 |
| IBP7         | Q16270     | AGAAAGGPGVSGVCVCK  | Insulin-like growth factor binding protein 7 |
| IBP7         | Q16270     | GHYGVQR            | Insulin-like growth factor binding protein 7 |
| ICAM1        | P05362     | DGTFPLPIGESVTVTR   | Intercellular adhesion molecule 1            |
| ICAM1        | P05362     | DLEGTYLCR          | Intercellular adhesion molecule 1            |
| MMP7         | P09237     | DLPHITVDR          | Matrix metalloproteinase 7                   |

|       |        |                 |                                      |
|-------|--------|-----------------|--------------------------------------|
| MMP7  | P09237 | FYLYDSETK       | Matrix metalloproteinase 7           |
| PODXL | O00592 | ATFNPAQDK       | Podocalyxin                          |
| PODXL | O00592 | LISLICR         | Podocalyxin                          |
| RENK  | O75787 | SFDTSLIR        | Renin receptor                       |
| SDC4  | P31431 | ETEVIDPQDLLEGR  | Syndecan-4                           |
| SDC4  | P31431 | AGSGSQVPTEPK    | Syndecan-4                           |
| SEPP1 | P49908 | LPTDSELAPR      | Selenoprotein P                      |
| SEPP1 | P49908 | QPPAWSIR        | Selenoprotein P                      |
| UPAR  | Q03405 | VEECALGQDLCK    | Urokinase receptor                   |
| UPAR  | Q03405 | LWEEGEELELVEK   | Urokinase receptor                   |
| UROK  | P00749 | KPSSPPEELK      | Urokinase-type plasminogen activator |
| UROK  | P00749 | SDALQLGLGK      | Urokinase-type plasminogen activator |
| VCAM1 | P19320 | ELQVYISPK       | Vascular cell adhesion protein 1     |
| VCAM1 | P19320 | SLEVTFTPVIEDIGK | Vascular cell adhesion protein 1     |

**Table S2. Endogenous peptides monitored in the targeted proteomics assay.**

| Protein                                                 | Uniprot ID | Peptide           | Position |      | Precursor<br>(Endogenous<br>Peptide)<br>m/z | Precursor<br>(Internal<br>Standard<br>Peptide) | Variability of<br>Peak Area<br>Ratio (PAR),<br>%CV | Variability of<br>Protein Peak<br>Area Ratio<br>(PAR), %CV | Fragments<br>y-ion (charge)             |
|---------------------------------------------------------|------------|-------------------|----------|------|---------------------------------------------|------------------------------------------------|----------------------------------------------------|------------------------------------------------------------|-----------------------------------------|
|                                                         |            |                   | Start    | End  |                                             |                                                |                                                    |                                                            |                                         |
| Podocalyxn (PODXL)                                      | O00592     | ATFNPAQDK         | 363      | 371  | 496.2458                                    | 500.2529                                       | 14%                                                | 16%                                                        | y5(1+), y5(2+), y7(1+)                  |
|                                                         |            | LISLICR           | 353      | 359  | 437.7626                                    | 442.7667                                       | 22%                                                |                                                            | y3(1+), y4(1+)                          |
| Urokinase-type plasminogen activator (UROK)             | P00749     | KPSSPPPELK        | 135      | 144  | 556.3033                                    | 560.3104                                       | 23%                                                | 20%                                                        | y6(1+), y8(1+)                          |
|                                                         |            | SDALQLGLGK        | 88       | 97   | 501.2849                                    | 505.2920                                       | 20%                                                |                                                            | y6(1+), y8(1+)                          |
| Epidermal Growth Factor (EGF)                           | P01133     | AEDDTWEPEQK       | 283      | 293  | 674.2886                                    | 678.2957                                       | 18%                                                | 18%                                                        | y4(1+), y6(1+), y7(1+), y9(1+)          |
|                                                         |            | IYWVDLER          | 65       | 72   | 547.2875                                    | 552.2916                                       | 25%                                                |                                                            | y5(1+), y6(1+), y7(1+)                  |
|                                                         |            | LGTAWCSCR         | 737      | 745  | 555.7446                                    | 560.7487                                       | 19%                                                |                                                            | y4(1+), y5(1+), y6(1+), y7(1+)          |
| Collagen alpha-1(I) chain (CO1A1)                       | P02452     | GEAGPQGPR         | 330      | 338  | 434.7172                                    | 439.7214                                       | 40%                                                | 40%                                                        | y5(1+), y6(1+), y7(1+)                  |
|                                                         |            | GSEGPQGVV         | 339      | 347  | 443.7225                                    | 448.7266                                       | 44%                                                |                                                            | y5(1+), y6(1+), y7(1+)                  |
| Collagen alpha-1(III) chain (CO3A1)                     | P02461     | DGNPGSDGLPGR      | 990      | 1001 | 571.2653                                    | 576.2694                                       | 60%                                                | 57%                                                        | y9(2+)                                  |
|                                                         |            | GPVGPSGPPGK       | 1116     | 1126 | 475.2587                                    | 479.2658                                       | 35%                                                |                                                            | y7(1+), y8(1+)                          |
| Intercellular adhesion molecule 1 (ICAM1)               | P05362     | DGTFPLPIGESVTIVR  | 406      | 421  | 844.9463                                    | 849.9505                                       | 32%                                                | 31%                                                        | y10(1+), y10(2+), y12(1+)               |
|                                                         |            | DLEGTYLCR         | 422      | 430  | 563.7635                                    | 568.7676                                       | 32%                                                |                                                            | y4(1+), y6(1+), y7(1+)                  |
| Cathepsin D (CATD)                                      | P07339     | LSPEDYTLK         | 328      | 336  | 533.2768                                    | 537.2839                                       | 14%                                                | 15%                                                        | y5(1+), y6(1+), y7(2+)                  |
|                                                         |            | VGFAEAA           | 383      | 390  | 410.7192                                    | 415.7234                                       | 19%                                                |                                                            | y4(1+), y5(1+), y6(1+)                  |
| Matrilysin (MMP7)                                       | P09237     | DLPHITVDR         | 101      | 109  | 533.2880                                    | 538.2921                                       | 13%                                                | 14%                                                        | y7(2+)                                  |
|                                                         |            | FYLYDSETK         | 24       | 32   | 583.2742                                    | 587.2813                                       | 17%                                                |                                                            | y6(1+), y8(1+)                          |
| Insulin-like growth factor-binding protein 2 (IBP2)     | P18065     | EPGCGCCSVCAR      | 45       | 56   | 706.7623                                    | 711.7665                                       | 38%                                                | 26%                                                        | y6(1+), y7(1+), y8(1+)                  |
|                                                         |            | LEGEACGVYTPR      | 57       | 68   | 676.3192                                    | 681.3233                                       | 22%                                                |                                                            | y6(1+), y7(1+), y11(1+)                 |
| Vascular cell adhesion protein 1 (VCAM1)                | P19320     | ELQVYISPK         | 191      | 199  | 538.8030                                    | 542.8101                                       | 12%                                                | 24%                                                        | y5(1+), y6(1+)                          |
|                                                         |            | SLEVTFTPIEDIGK    | 152      | 166  | 824.4456                                    | 828.4527                                       | 31%                                                |                                                            | y8(1+), y9(1+), y11(1+)                 |
| Connective tissue growth factor (CTGF)                  | P29279     | DGAPCIFGGTVYR     | 72       | 84   | 706.8350                                    | 711.8391                                       | 26%                                                | 26%                                                        | y7(1+), y8(1+), y9(1+)                  |
|                                                         |            | LPSPDCPFPR        | 116      | 125  | 593.2897                                    | 598.2938                                       | 27%                                                |                                                            | y5(1+), y7(2+), y8(1+)                  |
| Syndecan-4 (SDC-4)                                      | P31431     | AGSGSQVPTPEK      | 74       | 85   | 579.2935                                    | 583.3006                                       | 8%                                                 | 21%                                                        | y5(1+), y6(1+), y7(1+), y8(1+), y9(1+)  |
|                                                         |            | ETEVIDPQDLLEGR    | 4        | 17   | 807.4045                                    | 812.4086                                       | 30%                                                |                                                            | y8(1+), y9(1+), y10(1+)                 |
| Selenoprotein P (SEPP1)                                 | P49908     | LPTDSELAPR        | 269      | 278  | 549.7931                                    | 554.7973                                       | 22%                                                | 39%                                                        | y6(1+), y7(1+), y9(2+)                  |
|                                                         |            | QPPAWSIR          | 10       | 17   | 477.7614                                    | 482.7656                                       | 39%                                                |                                                            | y4(1+), y5(1+), y6(2+)                  |
| Urokinase plasminogen activator surface receptor (UPAR) | Q03405     | LWEEGEELEVEK      | 30       | 42   | 801.8985                                    | 805.9056                                       | 37%                                                | 33%                                                        | y9(1+), y10(1+), y11(1+)                |
|                                                         |            | VEECALGQDLGR      | 13       | 24   | 725.3267                                    | 730.3308                                       | 40%                                                |                                                            | y6(1+), y7(1+), y8(1+), y9(1+), y11(1+) |
| Insulin-like growth factor-binding protein 7 (IBP7)     | Q16270     | AGAAAGPGVSGVCVK   | 71       | 87   | 759.3636                                    | 763.3707                                       | 18%                                                | 18%                                                        | y11(1+), y12(1+)                        |
|                                                         |            | GHYGVQR           | 172      | 178  | 408.7092                                    | 413.7133                                       | 47%                                                |                                                            | y4(1+), y5(1+), y6(1+)                  |
| Endothelial cell-selective adhesion molecule (ESAM)     | Q96AP7     | DSGPYSCSVNVQDK    | 90       | 103  | 778.3383                                    | 782.3454                                       | 25%                                                | 22%                                                        | y7(1+), y8(1+)                          |
|                                                         |            | SKPAVGYQWDR       | 149      | 159  | 689.3491                                    | 694.3533                                       | 18%                                                |                                                            | y6(1+), y9(1+)                          |
| Cytosolic non-specific dipeptidase (CNDP2)              | Q96KP4     | EGGSIPVTILTFQATGK | 412      | 428  | 867.9491                                    | 871.9562                                       | 23%                                                | 21%                                                        | y10(1+), y12(1+), y12(2+)               |
|                                                         |            | TGQEIPIVNV        | 148      | 157  | 556.8066                                    | 561.8107                                       | 16%                                                |                                                            | y5(1+), y6(1+), y7(1+)                  |
| Aquaporin-2 (AQP2)                                      | P41181     | SLAPAVVTGK        | 187      | 196  | 471.7846                                    | 475.7917                                       | 23%                                                |                                                            | y5(1+), y6(1+), y7(1+), y7(2+), y9(1+)  |
| Insulin-like growth factor-binding protein 3 (IBP3)     | P17936     | ALAQCAPPPAVCAELVR | 19       | 35   | 911.9688                                    | 916.9729                                       | 37%                                                |                                                            | y11(1+), y11(2+), y12(1+), y13(1+)      |
| Renin receptor (RENK)                                   | O75787     | SFDTSLIR          | 251      | 258  | 469.7507                                    | 474.7549                                       | 17%                                                |                                                            | y4(1+), y6(1+)                          |

**Table S3. Distribution of JDRF cohorts by laboratory processing Subsets.**

| Cohort              | Discovery set |         |          |         | Validation set |         |
|---------------------|---------------|---------|----------|---------|----------------|---------|
|                     | Subset 1      |         | Subset 2 |         | Subset 3       |         |
|                     | Case          | Control | Case     | Control | Case           | Control |
| FinnDiane (n = 561) | 70            | 67      | 70       | 66      | 150            | 138     |
| Steno (n = 352)     | 23            | 57      | 18       | 81      | 39             | 134     |
| EDC (n=138)         | 14            | 20      | 16       | 18      | 33             | 37      |
| CACTI (n=219)       | 19            | 36      | 19       | 36      | 37             | 72      |
| Total (n=1270)      | 126           | 180     | 123      | 201     | 259            | 381     |

**Table S4. Baseline characteristics of participants from cohorts used for follow-up cathepsin D serum and urine measurements.**

|                                                         | Healthy Kidney Study<br>n = 19 | Pilot Vitamin D Trial<br>n = 21 | Boston Kidney Biopsy Cohort<br>n = 56 | Overall<br>n = 96 |
|---------------------------------------------------------|--------------------------------|---------------------------------|---------------------------------------|-------------------|
| <i>Demographics</i>                                     |                                |                                 |                                       |                   |
| Female sex                                              | 10 (53)                        | 7 (33)                          | 31 (55)                               | 48 (50)           |
| Age (years)                                             | 62.6 (11.6)                    | 60.3 (11.6)                     | 57.9 (14.8)                           | 59.3 (13.5)       |
| Race & ethnicity                                        |                                |                                 |                                       |                   |
| White                                                   | 18 (95)                        | 15 (71)                         | 27 (48)                               | 60 (62.5)         |
| Black                                                   | 0 (0)                          | 2 (10)                          | 21 (38)                               | 23 (24.0)         |
| Hispanic                                                | 0 (0)                          | 1 (5)                           | 8 (14)                                | 9 (9.4)           |
| American Indian / Native Alaskan                        | 1 (5)                          | 0 (0)                           | 0 (0)                                 | 1 (1.0)           |
| Native Hawaiian/ Pacific Islander                       | 0 (0)                          | 1 (5)                           | 0 (0)                                 | 1 (1.0)           |
| Asian                                                   | 0 (0)                          | 2 (10)                          | 2 (4)                                 | 4 (4.2)           |
| Unknown/other                                           | 0 (0)                          | 1 (5)                           | 6 (11)                                | 7 (7.3)           |
| BMI                                                     | 31.1 (6.6)                     | 36.8 (9.6)                      | 31 (5.9)                              | 33.0 (8.1)        |
| <i>Medical history and clinical characteristics</i>     |                                |                                 |                                       |                   |
| Hypertension history or on antihypertensive medications | 11 (57.9)                      | 19 (90.4)                       | 55 (98.2)                             | 85 (88.5)         |
| <i>Laboratory data at baseline</i>                      |                                |                                 |                                       |                   |
| eGFR (ml/min/1.72m <sup>2</sup> )                       | 86 (17)                        | 84 (17)                         | 32 (19)                               | 54 (32)           |
| UACR (mg/g), median (IQR)                               | 9 (6-14)                       | 35 (23-93)                      | 2310 (912-4603)                       | 441 (24-2893)     |

Categorical variables are listed as N (%), continuous variables are listed as mean (SD) unless otherwise stated.

Number (%) of missing values for each variable in the overall study population: BMI 38 (40), eGFR 1 (1), UACR 1 (1).

eGFR = estimated glomerular filtration rate; UACR = urine albumin creatinine ratio

**Table S5. Associations of 38 urine peptides with rapid eGFR decline in the JDRF Biomarkers Consortium discovery set.** Results from minimal, intermediate, and full covariate models are shown. The minimal model is adjusted for age, sex, and urine creatinine. The intermediate model is adjusted for these variables plus diabetes duration, antihypertensive medication use, systolic blood pressure, hemoglobin A1c. The full model is adjusted for variables in the preceding models plus urine albumin creatinine ratio and eGFR. Values for peptides with FDR < 5% are bolded and shaded.

|                                                        | Minimally adjusted model |                | Intermediately adjusted model |                | Fully adjusted model     |                |
|--------------------------------------------------------|--------------------------|----------------|-------------------------------|----------------|--------------------------|----------------|
|                                                        | OR (95% CI)              | FDR            | OR (95% CI)                   | FDR            | OR (95% CI)              | FDR            |
| Cathepsin D (VGFA...)                                  | <b>1.66 (1.37, 2.03)</b> | <b>1.8e-05</b> | <b>1.54 (1.26, 1.89)</b>      | <b>1.2e-03</b> | <b>1.44 (1.17, 1.78)</b> | <b>3.0e-02</b> |
| Cathepsin D (LSPE...)                                  | <b>1.55 (1.27, 1.88)</b> | <b>2.6e-04</b> | <b>1.44 (1.18, 1.76)</b>      | <b>8.2e-03</b> | 1.34 (1.09, 1.65)        | 1.1e-01        |
| Matrix metalloproteinase 7 (DLPH...)                   | <b>1.44 (1.19, 1.74)</b> | <b>1.4e-03</b> | <b>1.34 (1.11, 1.63)</b>      | <b>2.9e-02</b> | 1.24 (1.02, 1.52)        | 4.2e-01        |
| Insulin-like growth factor binding protein 2 (LEGE...) | <b>1.42 (1.16, 1.73)</b> | <b>4.2e-03</b> | 1.33 (1.08, 1.63)             | 5.8e-02        | 1.23 (0.99, 1.52)        | 4.9e-01        |
| Selenoprotein P (LPTD...)                              | <b>1.47 (1.21, 1.78)</b> | <b>1.1e-03</b> | <b>1.36 (1.11, 1.65)</b>      | <b>2.9e-02</b> | 1.20 (0.97, 1.48)        | 4.9e-01        |
| Collagen alpha-1(I) chain (GEAG...)                    | 1.01 (0.85, 1.20)        | 6.9e-01        | 1.09 (0.90, 1.32)             | 6.0e-01        | 1.19 (0.96, 1.47)        | 4.9e-01        |
| Cytosolic non-specific dipeptidase 2 (TGQE...)         | 1.17 (0.97, 1.42)        | 1.9e-01        | 1.16 (0.95, 1.40)             | 4.0e-01        | 1.18 (0.97, 1.45)        | 4.9e-01        |
| Cytosolic non-specific dipeptidase 2 (EGGS...)         | 1.21 (1.00, 1.46)        | 1.5e-01        | 1.17 (0.97, 1.42)             | 3.6e-01        | 1.18 (0.97, 1.43)        | 4.9e-01        |
| Vascular cell adhesion protein 1 (SLEV...)             | <b>1.41 (1.16, 1.71)</b> | <b>3.9e-03</b> | 1.28 (1.05, 1.56)             | 8.5e-02        | 1.17 (0.96, 1.44)        | 4.9e-01        |
| Connective tissue growth factor (LPSP...)              | 1.27 (1.04, 1.56)        | 8.7e-02        | 1.18 (0.96, 1.45)             | 3.6e-01        | 1.17 (0.94, 1.45)        | 4.9e-01        |
| Matrix metalloproteinase 7 (FYLY...)                   | <b>1.35 (1.11, 1.64)</b> | <b>1.5e-02</b> | 1.27 (1.04, 1.55)             | 9.5e-02        | 1.16 (0.95, 1.42)        | 4.9e-01        |
| Vascular cell adhesion protein 1 (ELQV...)             | <b>1.38 (1.14, 1.66)</b> | <b>4.2e-03</b> | 1.25 (1.04, 1.52)             | 9.5e-02        | 1.15 (0.94, 1.41)        | 4.9e-01        |
| Collagen alpha-1(I) chain (GSEG...)                    | 0.95 (0.80, 1.14)        | 6.9e-01        | 1.01 (0.84, 1.22)             | 9.3e-01        | 1.13 (0.92, 1.38)        | 6.4e-01        |
| Selenoprotein P (QPPA...)                              | 1.06 (0.87, 1.28)        | 6.8e-01        | 1.04 (0.85, 1.26)             | 8.8e-01        | 1.10 (0.89, 1.36)        | 7.5e-01        |
| Insulin-like growth factor binding protein 3           | 1.23 (1.01, 1.50)        | 1.4e-01        | 1.13 (0.92, 1.38)             | 4.9e-01        | 1.10 (0.89, 1.36)        | 7.5e-01        |
| Connective tissue growth factor (DGAP...)              | 1.07 (0.88, 1.29)        | 6.3e-01        | 1.03 (0.85, 1.25)             | 8.8e-01        | 1.09 (0.89, 1.33)        | 7.5e-01        |
| Urokinase receptor (VEEC...)                           | 1.21 (0.99, 1.47)        | 1.5e-01        | 1.12 (0.92, 1.37)             | 4.9e-01        | 1.06 (0.86, 1.30)        | 9.3e-01        |
| Collagen alpha-1(III) chain (GPVG...)                  | 0.86 (0.72, 1.04)        | 2.0e-01        | 0.92 (0.76, 1.12)             | 6.4e-01        | 1.04 (0.85, 1.27)        | 9.3e-01        |

|                                                        |                   |         |                   |         |                   |         |
|--------------------------------------------------------|-------------------|---------|-------------------|---------|-------------------|---------|
| Aquaporin-2                                            | 1.11 (0.92, 1.36) | 4.3e-01 | 1.07 (0.88, 1.31) | 7.0e-01 | 1.04 (0.84, 1.28) | 9.3e-01 |
| Urokinase receptor (LWEE...)                           | 1.20 (1.00, 1.44) | 1.5e-01 | 1.11 (0.92, 1.34) | 5.1e-01 | 1.03 (0.85, 1.25) | 9.3e-01 |
| Renin receptor                                         | 1.02 (0.85, 1.22) | 9.1e-01 | 1.01 (0.84, 1.21) | 9.3e-01 | 1.02 (0.84, 1.23) | 9.3e-01 |
| Insulin-like growth factor binding protein 7 (GHYG...) | 0.96 (0.80, 1.15) | 7.3e-01 | 1.00 (0.82, 1.20) | 9.6e-01 | 1.02 (0.83, 1.25) | 9.3e-01 |
| Syndecan-4 (AGSG...)                                   | 0.82 (0.69, 0.99) | 1.4e-01 | 0.89 (0.74, 1.09) | 4.9e-01 | 0.99 (0.80, 1.22) | 9.3e-01 |
| Intercellular adhesion molecule 1 (DLEG...)            | 1.20 (0.99, 1.45) | 1.6e-01 | 1.11 (0.91, 1.34) | 5.1e-01 | 0.99 (0.82, 1.20) | 9.3e-01 |
| Insulin-like growth factor binding protein 7 (AGAA...) | 0.97 (0.81, 1.17) | 8.5e-01 | 0.95 (0.79, 1.16) | 8.1e-01 | 0.99 (0.81, 1.21) | 9.3e-01 |
| Epidermal growth factor (IYVV...)                      | 0.91 (0.76, 1.11) | 5.0e-01 | 0.93 (0.76, 1.13) | 6.9e-01 | 0.99 (0.80, 1.21) | 9.3e-01 |
| Urokinase-type plasminogen activator (SDAL...)         | 0.85 (0.71, 1.01) | 1.6e-01 | 0.89 (0.74, 1.07) | 4.9e-01 | 0.98 (0.80, 1.20) | 9.3e-01 |
| Syndecan-4 (ETEV...)                                   | 0.82 (0.69, 0.99) | 1.4e-01 | 0.94 (0.77, 1.14) | 7.2e-01 | 0.98 (0.80, 1.20) | 9.3e-01 |
| Epidermal growth factor (AEDD...)                      | 0.89 (0.73, 1.09) | 4.0e-01 | 0.91 (0.74, 1.12) | 6.0e-01 | 0.97 (0.78, 1.21) | 9.3e-01 |
| Podocalyxin (ATFN...)                                  | 1.09 (0.90, 1.32) | 5.1e-01 | 1.01 (0.83, 1.24) | 9.3e-01 | 0.96 (0.78, 1.18) | 9.3e-01 |
| Insulin-like growth factor binding protein 2 (EPGC...) | 1.07 (0.88, 1.30) | 6.3e-01 | 1.01 (0.83, 1.24) | 9.3e-01 | 0.96 (0.78, 1.18) | 9.3e-01 |
| Endothelial cell-selective adhesion molecule (DSGP...) | 1.00 (0.83, 1.22) | 9.9e-01 | 0.95 (0.79, 1.16) | 8.1e-01 | 0.96 (0.78, 1.18) | 9.3e-01 |
| Urokinase-type plasminogen activator (KPSS...)         | 0.85 (0.71, 1.01) | 1.6e-01 | 0.89 (0.74, 1.08) | 4.9e-01 | 0.95 (0.78, 1.15) | 9.3e-01 |
| Collagen alpha-1 (III) chain (DGNP...)                 | 0.85 (0.71, 1.03) | 1.9e-01 | 0.86 (0.71, 1.04) | 3.6e-01 | 0.93 (0.76, 1.13) | 8.2e-01 |
| Intercellular adhesion molecule I (DGTF...)            | 1.00 (0.84, 1.19) | 9.9e-01 | 0.97 (0.81, 1.17) | 8.8e-01 | 0.91 (0.75, 1.11) | 7.5e-01 |
| Endothelial cell-selective adhesion molecule (SKPA...) | 0.87 (0.73, 1.03) | 2.0e-01 | 0.87 (0.72, 1.05) | 4.1e-01 | 0.90 (0.74, 1.10) | 7.5e-01 |
| Podocalyxin (LISL...)                                  | 0.90 (0.75, 1.07) | 3.8e-01 | 0.89 (0.74, 1.06) | 4.9e-01 | 0.87 (0.72, 1.06) | 4.9e-01 |
| Epidermal growth factor (LGTA...)                      | 0.85 (0.70, 1.02) | 1.6e-01 | 0.84 (0.70, 1.02) | 3.2e-01 | 0.85 (0.69, 1.05) | 4.9e-01 |

**Table S6. Associations of 20 urine proteins with rapid eGFR decline in the JDRF Biomarkers Consortium discovery set.** Results from minimal, intermediate, and full covariate models are shown. The minimal model is adjusted for age, sex, and urine creatinine. The intermediate model is adjusted for these variables plus diabetes duration, antihypertensive medication use, systolic blood pressure, hemoglobin A1c. The full model is adjusted for variables in the preceding models plus urine albumin creatinine ratio and eGFR. Values for proteins with FDR < 5% are bolded and shaded.

|                                              | Minimally adjusted model |                | Intermediately adjusted model |                | Fully adjusted model     |                |
|----------------------------------------------|--------------------------|----------------|-------------------------------|----------------|--------------------------|----------------|
|                                              | OR (95% CI)              | FDR            | OR (95% CI)                   | FDR            | OR (95% CI)              | FDR            |
| Cathepsin D                                  | <b>1.63 (1.34, 1.99)</b> | <b>3.6-05</b>  | <b>1.51 (1.23, 1.85)</b>      | <b>1.9e-03</b> | <b>1.41 (1.14, 1.74)</b> | <b>3.7e-02</b> |
| Matrix metalloproteinase 7                   | <b>1.45 (1.18, 1.77)</b> | <b>2.9e-03</b> | <b>1.35 (1.10, 1.66)</b>      | <b>4.8e-02</b> | 1.23 (0.99, 1.52)        | 4.9e-01        |
| Selenoprotein P                              | <b>1.38 (1.0, 1.74)</b>  | <b>2.8e-02</b> | 1.28 (1.01, 1.62)             | 2.0e-01        | 1.20 (0.94, 1.54)        | 4.9e-01        |
| Cytosolic non-specific dipeptidase 2         | 1.20 (99, 1.46)          | 1.4e-01        | 1.18 (0.97, 1.43)             | 4.2e-01        | 1.19 (0.97, 1.46)        | 4.9e-01        |
| Vascular cell adhesion protein 1             | <b>1.41 (1.17, 1.71)</b> | <b>2.9e-03</b> | 1.28 (1.05, 1.56)             | 8.9e-02        | 1.17 (0.95, 1.45)        | 4.9e-01        |
| Collagen alpha-1(I) chain                    | 0.98 (0.82, 1.18)        | 8.4e-01        | 1.06 (0.87, 1.28)             | 6.9e-01        | 1.17 (0.95, 1.46)        | 4.9e-01        |
| Connective tissue growth factor              | 1.18 (0.96, 1.46)        | 1.8e-01        | 1.11 (0.90, 1.38)             | 4.6e-01        | 1.15 (0.92, 1.43)        | 6.5e-01        |
| Insulin-like growth factor binding protein 3 | 1.23 (1.01, 1.50)        | 1.1e-01        | 1.13 (0.92, 1.38)             | 4.3e-01        | 1.10 (0.89, 1.36)        | 7.7e-01        |
| Insulin-like growth factor binding protein 2 | 1.25 (1.02, 1.54)        | 1.1e-01        | 1.17 (0.95, 1.45)             | 4.3e-01        | 1.09 (0.88, 1.36)        | 7.7e-01        |
| Urokinase-type plasminogen activator         | 1.23 (1.01, 1.51)        | 1.1e-01        | 1.13 (0.92, 1.40)             | 4.3e-01        | 1.05 (0.85, 1.30)        | 9.1e-01        |
| Aquaporin 2                                  | 1.11 (0.92, 1.36)        | 4.0e-01        | 1.07 (0.88, 1.31)             | 6.2e-01        | 1.04 (0.84, 1.28)        | 9.1e-01        |
| Renin receptor                               | 1.02 (0.85, 1.22)        | 8.4e-01        | 1.01 (0.84, 1.21)             | 8.9e-01        | 1.02 (0.84, 1.23)        | 9.1e-01        |
| Insulin-like growth factor binding protein 7 | 0.95 (0.76, 1.18)        | 7.6e-01        | 0.96 (0.77, 1.22)             | 8.0e-01        | 1.01 (0.79, 1.28)        | 9.7e-01        |
| Collagen alpha-1(III) chain                  | 0.83 (0.67, 1.02)        | 1.4e-01        | 0.87 (0.70, 1.07)             | 4.3e-01        | 0.98 (0.78, 1.22)        | 9.1e-01        |
| Syndecan-4                                   | 0.83 (0.68, 1.02)        | 1.5e-01        | 0.90 (0.72, 1.11)             | 4.6e-01        | 0.98 (0.78, 1.23)        | 9.1e-01        |
| Urokinase receptor                           | 0.82 (0.67, 0.99)        | 1.1e-01        | 0.87 (0.71, 1.07)             | 4.3e-01        | 0.96 (0.77, 1.19)        | 9.1e-01        |
| Intercellular adhesion molecule 1            | 1.11 (0.91, 1.36)        | 4.1e-01        | 1.04 (0.85, 1.28)             | 7.5e-01        | 0.94 (0.76, 1.16)        | 8.4e-01        |
| Epidermal growth factor                      | 0.85 (0.69, 1.06)        | 2.2e-01        | 0.86 (0.69, 1.08)             | 4.3e-01        | 0.92 (0.72, 1.16)        | 7.7e-01        |
| Endothelial cell-selective adhesion molecule | 0.91 (0.74, 1.11)        | 4.3e-01        | 0.88 (0.71, 1.09)             | 4.3e-01        | 0.91 (0.73, 1.14)        | 7.7e-01        |
| Podocalyxin                                  | 0.98 (0.80, 1.19)        | 8.4e-01        | 0.93 (0.76, 1.14)             | 6.2e-01        | 0.90 (0.73, 1.12)        | 7.7e-01        |

**Table S7. Associations of urine cathepsin D peptides and protein with rapid eGFR decline in the JDRF Biomarkers Consortium validation set.** Results from minimal, intermediate, and full covariate models are shown. The minimal model is adjusted for age, sex, urine creatinine, and sample processing site. The intermediate model is adjusted for these variables plus diabetes duration, antihypertensive medication use, systolic blood pressure, hemoglobin A1c. The full model is adjusted for variables in the preceding models plus urine albumin creatinine ratio and eGFR.

|                       | Minimally adjusted model |         | Intermediately adjusted model |         | Fully adjusted model |         |
|-----------------------|--------------------------|---------|-------------------------------|---------|----------------------|---------|
|                       | OR (95% CI)              | p-value | OR (95% CI)                   | p-value | OR (95% CI)          | p-value |
| Cathepsin D (VGFA...) | 1.51 (1.23, 1.86)        | 0.0001  | 1.44 (1.16, 1.79)             | 0.001   | 1.21 (0.96, 1.53)    | 0.11    |
| Cathepsin D (LSPE...) | 1.40 (1.14, 1.72)        | 0.001   | 1.34 (1.08, 1.66)             | 0.007   | 1.12 (0.89, 1.40)    | 0.34    |
| Cathepsin D           | 1.47 (1.19, 1.81)        | 0.0003  | 1.40 (1.13, 1.74)             | 0.003   | 1.17 (0.92, 1.47)    | 0.20    |

**Table S8. Associations of cathepsin D protein with rapid eGFR decline in the JDRF Biomarkers Consortium discovery set, sequentially adjusted for full covariate model variables.**

[illegible]

**Table S9. Associations of cathepsin D protein with rapid eGFR decline in the JDRF Biomarkers Consortium validation set, sequentially adjusted for full covariate model variables.**

| Variable                                                 | Model 0<br>OR (95%<br>CI) | Model 1<br>OR (95%<br>CI) | Model 2<br>OR (95%<br>CI) | Model 3<br>OR (95%<br>CI) | Model 4<br>OR (95%<br>CI) | Model 5<br>OR (95%<br>CI) | Model 6<br>OR (95%<br>CI) | Model 7<br>OR (95%<br>CI)                    | Model 8<br>OR (95%<br>CI)                    | Model 9<br>OR (95%<br>CI) | Model 10<br>OR (95%<br>CI) |
|----------------------------------------------------------|---------------------------|---------------------------|---------------------------|---------------------------|---------------------------|---------------------------|---------------------------|----------------------------------------------|----------------------------------------------|---------------------------|----------------------------|
| Cathepsin D<br>(per 1 SD)                                | 1.13<br>(0.96,<br>1.33)   | 1.12<br>(0.96,<br>1.32)   | 1.14<br>(0.97,<br>1.34)   | 1.25<br>(1.04,<br>1.49)   | 1.23<br>(1.03,<br>1.47)   | 1.34<br>(1.12,<br>1.62)   | 1.33<br>(1.11,<br>1.61)   | <b>1.34</b><br><b>(1.11,</b><br><b>1.62)</b> | <b>1.19</b><br><b>(0.98,</b><br><b>1.45)</b> | 1.16<br>(0.95,<br>1.42)   | 1.17<br>(0.92,<br>1.47)    |
| Age (per 1<br>SD)                                        |                           | 0.68<br>(0.58,<br>0.81)   | 0.70<br>(0.59,<br>0.82)   | 0.66<br>(0.56,<br>0.79)   | 0.57<br>(0.45,<br>0.71)   | 0.45<br>(0.35,<br>0.58)   | 0.45<br>(0.35,<br>0.58)   | 0.47<br>(0.36,<br>0.60)                      | 0.54<br>(0.41,<br>0.70)                      | 0.65<br>(0.49,<br>0.86)   | 0.65<br>(0.49,<br>0.87)    |
| Sex<br>(reference:<br>male)                              |                           |                           | 1.29<br>(0.93,<br>1.78)   | 1.14<br>(0.81,<br>1.60)   | 1.11<br>(0.79,<br>1.57)   | 1.30<br>(0.91,<br>1.85)   | 1.29<br>(0.91,<br>1.84)   | 1.38<br>(0.96,<br>1.98)                      | 1.41<br>(0.97,<br>2.04)                      | 1.53<br>(1.05,<br>2.25)   | 1.53<br>(1.05,<br>2.25)    |
| Log-2 Urine<br>creatinine<br>(per 1 SD)                  |                           |                           |                           | 0.77<br>(0.64,<br>0.92)   | 0.78<br>(0.65,<br>0.94)   | 0.80<br>(0.67,<br>0.97)   | 0.81<br>(0.67,<br>0.98)   | 0.85<br>(0.70,<br>1.03)                      | 0.94<br>(0.78,<br>1.15)                      | 0.96<br>(0.79,<br>1.18)   | 0.96<br>(0.79,<br>1.18)    |
| Diabetes<br>duration<br>(per 1 SD)                       |                           |                           |                           |                           | 1.28<br>(1.02,<br>1.60)   | 1.27<br>(1.00,<br>1.59)   | 1.25<br>(0.99,<br>1.58)   | 1.33<br>(1.05,<br>1.69)                      | 1.23<br>(0.96,<br>1.56)                      | 1.27<br>(0.99,<br>1.63)   | 1.27<br>(0.99,<br>1.64)    |
| SBP (per 1<br>SD)                                        |                           |                           |                           |                           |                           | 1.69<br>(1.38,<br>2.06)   | 1.64<br>(1.34,<br>2.02)   | 1.55<br>(1.26,<br>1.91)                      | 1.35<br>(1.09,<br>1.68)                      | 1.37<br>(1.09,<br>1.70)   | 1.36<br>(1.09,<br>1.71)    |
| Antihyperte<br>nsive<br>medication<br>(reference:<br>no) |                           |                           |                           |                           |                           |                           | 1.20<br>(0.83,<br>1.73)   | 1.09<br>(0.75,<br>1.58)                      | 0.70<br>(0.46,<br>1.06)                      | 0.77<br>(0.50,<br>1.18)   | 0.77<br>(0.50,<br>1.18)    |
| HbA1c (per 1<br>SD)                                      |                           |                           |                           |                           |                           |                           |                           | 1.55<br>(1.29,<br>1.88)                      | 1.42<br>(1.17,<br>1.73)                      | 1.38<br>(1.13,<br>1.69)   | 1.38<br>(1.13,<br>1.69)    |
| Log-2 UACR<br>(per 1 SD)                                 |                           |                           |                           |                           |                           |                           |                           |                                              | 1.84<br>(1.48,<br>2.30)                      | 2.13<br>(1.68,<br>2.71)   | 2.13<br>(1.67,<br>2.71)    |
| eGFR (per 1<br>SD)                                       |                           |                           |                           |                           |                           |                           |                           |                                              |                                              | 1.62<br>(1.29,<br>2.02)   | 1.62<br>(1.29,<br>2.02)    |
| Sample<br>processing<br>batch (ref:<br>no)               |                           |                           |                           |                           |                           |                           |                           |                                              |                                              |                           | 1.01<br>(0.58,<br>1.75)    |

**Table S10. Associations of cathepsin D peptides and protein with rapid eGFR decline in the discovery set, stratified by baseline UACR and eGFR.** Results from full covariate models are shown, adjusted for age, sex, urine creatinine, diabetes duration, antihypertensive medication use, systolic blood pressure, hemoglobin A1c, urine albumin creatinine ratio, and eGFR. Values for proteins with p <0.05 are bolded.

|                                        | Cathepsin D (LSPE...)    |               | Cathepsin D (VGFA...)    |               | Cathepsin D              |               |
|----------------------------------------|--------------------------|---------------|--------------------------|---------------|--------------------------|---------------|
|                                        | OR (95% CI)              | p-value       | OR (95% CI)              | p-value       | OR (95% CI)              | p-value       |
| <b>UACR group (mg/g)</b>               |                          |               |                          |               |                          |               |
| Normo: ≤30                             | <b>1.34 (1.01, 1.77)</b> | <b>0.043</b>  | <b>1.38 (1.04, 1.85)</b> | <b>0.029</b>  | <b>1.37 (1.03, 1.83)</b> | <b>0.033</b>  |
| Micro: >30,<300                        | <b>2.10 (1.25, 3.55)</b> | <b>0.0059</b> | <b>2.25 (1.33, 3.81)</b> | <b>0.003</b>  | <b>2.27 (1.33, 3.87)</b> | <b>0.0032</b> |
| Macro: ≥300                            | 0.83 (0.33, 2.11)        | 0.70          | 1.04 (0.42, 2.61)        | 0.93          | 0.93 (0.36, 2.40)        | 0.88          |
| <b>eGFR (ml/min/1.73m<sup>2</sup>)</b> |                          |               |                          |               |                          |               |
| 120 < eGFR ≤ 150                       | 0.75 (0.33, 1.67)        | 0.48          | 1.00 (0.46, 2.18)        | 0.99          | 0.86 (0.38, 1.92)        | 0.71          |
| 90 < eGFR ≤ 120                        | <b>1.61 (1.14, 2.28)</b> | <b>0.007</b>  | <b>1.68 (1.18, 2.40)</b> | <b>0.0043</b> | <b>1.68 (1.17, 2.39)</b> | <b>0.0048</b> |
| 60 eGFR ≤ 90                           | <b>1.55 (1.05, 2.27)</b> | <b>0.028</b>  | <b>1.64 (1.12, 2.40)</b> | <b>0.012</b>  | <b>1.62 (1.10, 2.39)</b> | <b>0.016</b>  |

**Table S11. Associations of cathepsin D peptides and protein with rapid eGFR decline in the validation set, stratified by baseline UACR and eGFR.** Results from full covariate models are shown, adjusted for age, sex, urine creatinine, diabetes duration, antihypertensive medication use, systolic blood pressure, hemoglobin A1c, urine albumin creatinine ratio, eGFR, and sample processing site.

|                                        | Cathepsin D (LSPE...) |         | Cathepsin D (VGFA...) |         | Cathepsin D        |         |
|----------------------------------------|-----------------------|---------|-----------------------|---------|--------------------|---------|
|                                        | OR (95% CI)           | p-value | OR (95% CI)           | p-value | OR (95% CI)        | p-value |
| <b>UACR group (mg/g)</b>               |                       |         |                       |         |                    |         |
| Normo: ≤30                             | 1.00 (0.73, 1.37)     | 0.99    | 1.08 (0.78, 1.48)     | 0.64    | 1.04 (0.75, 1.43)  | 0.82    |
| Micro: >30,<300                        | 1.58 (0.96, 2.57)     | 0.072   | 1.66 (0.99, 2.79)     | 0.059   | 1.64 (0.98, 2.73)  | 0.061   |
| Macro: ≥300                            | 3.70 (0.74, 18.49)    | 0.12    | 3.27 (0.75, 14.26)    | 0.12    | 3.54 (0.75, 16.72) | 0.12    |
| <b>eGFR (ml/min/1.73m<sup>2</sup>)</b> |                       |         |                       |         |                    |         |
| 120 < eGFR ≤ 150                       | 0.90 (0.45, 1.77)     | 0.75    | 1.10 (0.55, 2.18)     | 0.79    | 0.99 (0.50, 1.96)  | 0.97    |
| 90 < eGFR ≤ 120                        | 1.03 (0.71, 1.50)     | 0.87    | 1.10 (0.75, 1.60)     | 0.63    | 1.07 (0.73, 1.56)  | 0.74    |
| 60 eGFR ≤ 90                           | 1.07 (0.71, 1.62)     | 0.74    | 1.20 (0.76, 1.87)     | 0.44    | 1.13 (0.73, 1.75)  | 0.58    |

**Table S12. Associations between serum cathepsin D and histopathological features in the Boston Kidney Biopsy Cohort.**

| Histopathologic lesion                               | Severity                                          | N (% total) | Mean serum cathepsin D in ng/mL (SD) | Adjusted difference in cathepsin D concentration in ng/mL (95% CI)* | Trend test p-value* |
|------------------------------------------------------|---------------------------------------------------|-------------|--------------------------------------|---------------------------------------------------------------------|---------------------|
| <i>Tubulointerstitial compartment</i>                |                                                   |             |                                      |                                                                     |                     |
| Interstitial fibrosis and tubular atrophy            | ≤ 50%                                             | 22          | 389.3 (229.7)                        | Ref.                                                                | 0.11                |
|                                                      | >50%                                              | 31          | 401.6 (171.6)                        | 24.8 (-85.3, 134.8)                                                 |                     |
| Tubulointerstitial inflammation, with fibrosed area  | Mild, 11-25%                                      | 33          | 401.2 (221.3)                        | Ref.                                                                | 0.78                |
|                                                      | Moderate, 26-50% or Severe >50%                   | 20          | 388.9 (149.5)                        | -16.3 (-124.6, 91.9)                                                |                     |
| Tubulointerstitial inflammation, with preserved area | None, < 10%                                       | 46          | 396.8 (206.2)                        | Ref.                                                                | 0.78                |
|                                                      | Mild, 11-25%, Moderate, 26- 50% or Severe, > 50%  | 4           | 408.0 (122.5)                        | 27.5 (-183.8, 238.8)                                                |                     |
| Acute tubular injury                                 | None                                              | 27          | 364.0 (171.1)                        | Ref.                                                                | 0.35                |
|                                                      | Mild or Moderate                                  | 26          | 430.3 (216.8)                        | 63.1 (-40.4, 166.6)                                                 |                     |
| <i>Glomerular compartment</i>                        |                                                   |             |                                      |                                                                     |                     |
| Global glomerulosclerosis                            | None < 10% or Mild, 11-25%                        | 15          | 394.3 (269.8)                        | Ref.                                                                | 0.85                |
|                                                      | Moderate, 26-50%                                  | 22          | 426.5 (182.3)                        | 53.0 (-80.6, 186.5)                                                 |                     |
|                                                      | Severe, >50%                                      | 18          | 367.8 (147.2)                        | -18.4 (-162.8, 126.0)                                               |                     |
| Segmental glomerulosclerosis                         | None, <10%                                        | 43          | 393.3 199.9)                         | Ref.                                                                | 0.08                |
|                                                      | Mild, 11-25%, Moderate, 26- 50%, or Severe, > 50% | 10          | 437.3 (207.5)                        | 58.1 (-80.7, 197.0)                                                 |                     |
| Mesangial matrix expansion                           | Mild or Moderate                                  | 19          | 395.2 (215.4)                        | Ref.                                                                | 0.39                |
|                                                      | Severe                                            | 36          | 405.8 (191.4)                        | 34.4 (-77.2, 145.9)                                                 |                     |
| Mesangial hypercellularity                           | None or Mild                                      | 14          | 456.1 (265.3)                        | Ref.                                                                | 0.15                |
|                                                      | Moderate                                          | 27          | 418.5 (175.0)                        | -32.8 (-160.2, 94.5)                                                |                     |
|                                                      | Severe                                            | 10          | 309.0 (132.1)                        | -139.5 (-299.2, 20.3)                                               |                     |
| <i>Vascular compartment</i>                          |                                                   |             |                                      |                                                                     |                     |
| Arterial sclerosis                                   | Mild or Moderate                                  | 23          | 409.2 (221.8)                        | Ref.                                                                | 0.38                |
|                                                      | Severe                                            | 30          | 386.8 (176.7)                        | -43.2 (-150.5, 64.1)                                                |                     |
| Arteriolar hyalinosisclerosis                        | Mild or Moderate                                  | 15          | 420.1 (272.4)                        | Ref.                                                                | 0.72                |
|                                                      | Severe                                            | 38          | 387.2 (159.7)                        | -39.3 (-156.1, 77.4)                                                |                     |

\*Adjusted for age and sex. Calculated using all available histopathologic lesion severity categories instead of combined categories.

Histopathologic lesion severities were collapsed to create balanced distributions. Trend test p-values were calculated for original, non-collapsed histopathologic lesion severity categories.

Number (%) of missing values for each variable in the overall study population: interstitial fibrosis and tubular atrophy 3 (5), tubulointerstitial inflammation, with fibrosed area 3 (5), tubulointerstitial inflammation, with preserved area 6 (11), acute tubular injury 3 (5), global glomerulosclerosis 1 (2), segmental glomerulosclerosis 3 (5), mesangial matrix expansion 1 (2), mesangial hypercellularity 5 (9), arterial sclerosis 3 (5), arteriolar hyalinosclerosis 3 (5).

**Table S13. Associations between urine creatinine-normalized cathepsin D and serum cathepsin D in follow-up analyses.**

|                                            | <b>Model 1</b>                                                          |         | <b>Model 2</b>                                                          |             | <b>Model 3</b>                                                          |                   |
|--------------------------------------------|-------------------------------------------------------------------------|---------|-------------------------------------------------------------------------|-------------|-------------------------------------------------------------------------|-------------------|
|                                            | Difference in urine creatinine-normalized cathepsin D in ng/mg (95% CI) | p-value | Difference in urine creatinine-normalized cathepsin D in ng/mg (95% CI) | p-value     | Difference in urine creatinine-normalized cathepsin D in ng/mg (95% CI) | p-value           |
| Serum cathepsin D (per 10ng/mL higher)     | 1.1 (-0.1, 2.2)                                                         | 0.07    | <b>1.2 (0.1, 2.3)</b>                                                   | <b>0.03</b> | -0.1 (-1.1, 1.0)                                                        | 0.92              |
| Sex (ref: male)                            |                                                                         |         | <b>53.5 (12.6-94.4)</b>                                                 | <b>0.01</b> | <b>41.8 (5.6, 78.1)</b>                                                 | <b>0.03</b>       |
| Age (per 1 year older)                     |                                                                         |         | -1.1 (-2.6, 0.4)                                                        | 0.15        | -0.4 (-1.8, 0.9)                                                        | 0.55              |
| eGFR (per 10 ml/min/m <sup>2</sup> higher) |                                                                         |         |                                                                         |             | -1.1 (-9.5, 7.3)                                                        | 0.80              |
| UACR (per doubling)                        |                                                                         |         |                                                                         |             | <b>15.0 (7.8, 22.2)</b>                                                 | <b>&lt; 0.001</b> |

**Table S14. Baseline characteristics of Pima Indian study cohort subjects with type 2 diabetes.**

| <b>Baseline Characteristics</b> | <b>T2D Pima Indian cohort<br/>(N = 74)</b> |
|---------------------------------|--------------------------------------------|
| <b>Male, N%</b>                 | 22 (30)                                    |
| <b>Age, years</b>               | 46 (10)                                    |
| <b>Diabetes duration, years</b> | 15.50 (6.05)                               |
| <b>HbA1C, %</b>                 | 9.3 (2.01)                                 |
| <b>GFR, ml/min</b>              | 145 (53)                                   |
| <b>UACR, mg/g Cr</b>            | 35 [11-147]                                |

Values reported as N(%), Mean(SD), %N or Median [IQR].

Abbreviations: SD – standard deviation, IQR – interquartile range, GFR – measured glomerular filtration rate, UACR – albumin to creatinine ratio

**Table S15. Characteristics of Kidney Precision Medicine Project (KPMP) subjects with diabetes and chronic kidney disease used for cathepsin D single cell RNAseq kidney tissue measurements.**

| <b>Variable</b>                                          | <b>N (%)</b> |
|----------------------------------------------------------|--------------|
| <b>Female sex</b>                                        | 7 (70)       |
| <b>Age, years</b>                                        |              |
| 30-39                                                    | 2 (20)       |
| 60-69                                                    | 5 (50)       |
| 70-79                                                    | 3 (30)       |
| <b>Race</b>                                              |              |
| White                                                    | 7 (70)       |
| Black or African American                                | 2 (20)       |
| <b>Baseline eGFR, ml/min/1.73m<sup>2</sup></b>           |              |
| ≥90                                                      | 2 (20)       |
| 60-89                                                    | 2 (20)       |
| 30-49                                                    | 5 (50)       |
| 15-29                                                    | 1 (10)       |
| <b>UPCR, mg/g</b>                                        |              |
| < 150                                                    | 2 (20)       |
| 150-499                                                  | 1 (10)       |
| 500-999                                                  | 2 (20)       |
| ≥ 1000mg                                                 | 3 (20)       |
| <b>UACR, mg/g</b>                                        |              |
| < 30                                                     | 2 (20)       |
| 30-299                                                   | 1 (10)       |
| ≥ 300                                                    | 5 (50)       |
| <b>A1c, %</b>                                            |              |
| < 6.5                                                    | 1 (10)       |
| 6.5-7.5                                                  | 4 (40)       |
| > 8.5                                                    | 2 (20)       |
| <b>Hypertension present</b>                              | 9 (90)       |
| <b>Hypertension duration, years</b>                      | 9 (90)       |
| < 5                                                      | 3 (30)       |
| 5-9                                                      | 1 (10)       |
| > 10                                                     | 5 (50)       |
| <b>Renin-angiotensin-aldosterone system blockade use</b> | 7 (70)       |

Number (%) of missing values for each variable: Race 1 (10), proteinuria 2 (20), albuminuria 2 (20), A1c 3 (30), HTN duration 1 (10).

UPCR = urine protein-creatinine ratio; UACR = urine albumin-creatinine ratio

## Supplemental Figures

**Figure S1. Cathepsin D activity in the media of MCT cells transfected with CatD-siRNA or Ctr-siRNA after 24 hours of treatment.** (A) Cathepsin D activity level normalized to actine is reduced in cells transfected with cathepsin D siRNA (CatD-siRNA) but not control siRNA (Ctr-siRNA) or non-transfected cells. (B) Cathepsin D enzyme activity is reduced in MCT cells transfected with CatD-siRNA compared to cells transfected with Ctr-siRNA when exposed to either AGE-BSA or Ctr-BSA. Cathepsin D activity is noted in relative fluorescent units (RFU). (C) Western blot illustrating reduced cathepsin D with CatD-siRNA. \*\*  $p < 0.01$ , \*\*\*  $p < 0.001$ , \*\*\*\*  $p < 0.0001$

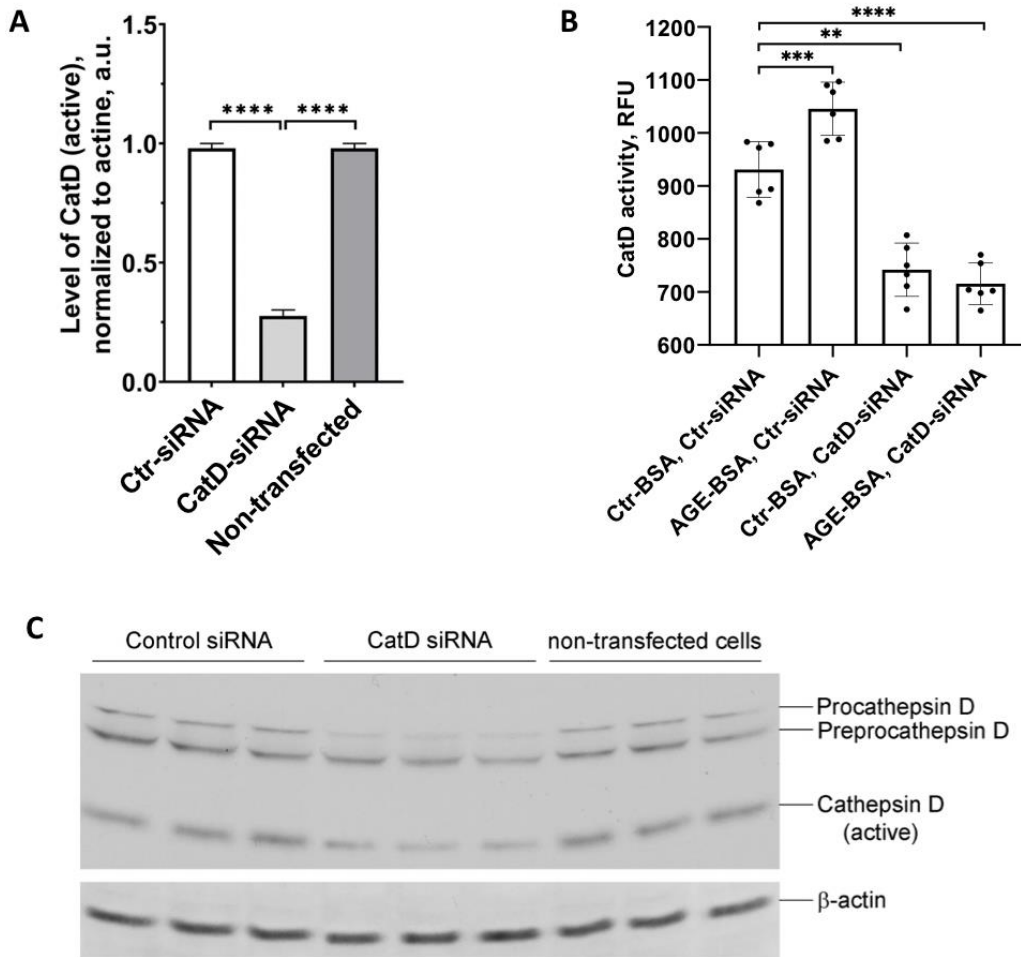

**Figure S2. Cathepsin D follow-up cohort measurements.** (A) Laboratory characteristics of follow-up cohort participants. Entries are mean (SD) for continuous variables unless otherwise indicated. Urine and serum cathepsin D are higher with greater albuminuria and lower eGFR. The interclass correlation coefficient for pilot Vitamin D trial urine cathepsin D measurements at baseline, 3, and 6 months was 0.52. (B) Urine and serum cathepsin D correlate only weakly in people with diabetes and a broad range of kidney damage.

**A.**

|                                                        | HKS<br>n = 19 | Pilot Vitamin D Trial<br>n = 21 | BKBC<br>n = 56  |
|--------------------------------------------------------|---------------|---------------------------------|-----------------|
| UACR (mg/g), median (Q <sub>1</sub> , Q <sub>3</sub> ) | 9 (6-14)      | 35 (23-93)                      | 2310 (913-4604) |
| eGFR (ml/min/1.73m <sup>2</sup> )                      | 86 (17)       | 84 (17)                         | 32 (19)         |
| Urine Cathepsin D (ng/mg Cr)                           | 44 (17)       | 76 (32)                         | 155 (121)       |
| Serum Cathepsin D (ng/mL)                              | 285 (141)     | 200 (91)                        | 399 (198)       |

**B.**

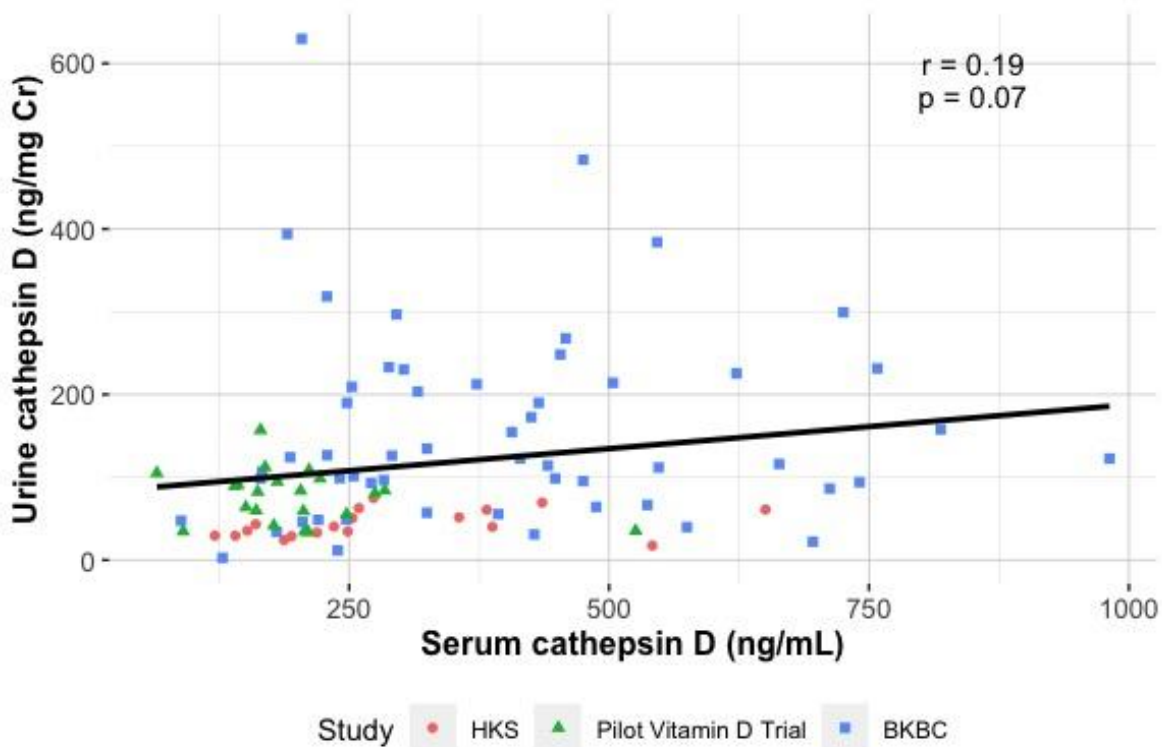

UACR = urine albumin-creatinine ratio; eGFR = estimated glomerular filtration rate; HKS = Health Kidney Study; BKBC = Boston Kidney Biopsy Cohort

**Figure S3. Violin plots depicting cathepsin D (*CTSD*) mRNA expression levels across kidney cell types derived using single-cell RNA sequencing from Kidney Precision Medicine Project (KPMP) biopsy samples.** Each point represents a single cell in the respective cluster/group. DKD: diabetic kidney disease, LD: living donor; ATL: thin ascending loop of Henle; Bcells: B cells; CNT: connecting tubule; DCT: distal convoluted tubule; DTL: Descending thin limb cell; EC: glomerular endothelial cells; FIB: Fibroblast; IC: collecting duct intercalated cells; MC: mesangial cells; MYL: Myeloid cell; PEC: <https://www.mikmtmc.org>; PC: collecting duct principal cells; PT: proximal tubule cells; POD: podocytes. TAL: thick ascending loop of Henle; Tcells: T cells; vSMC: Vascular smooth muscle cell.

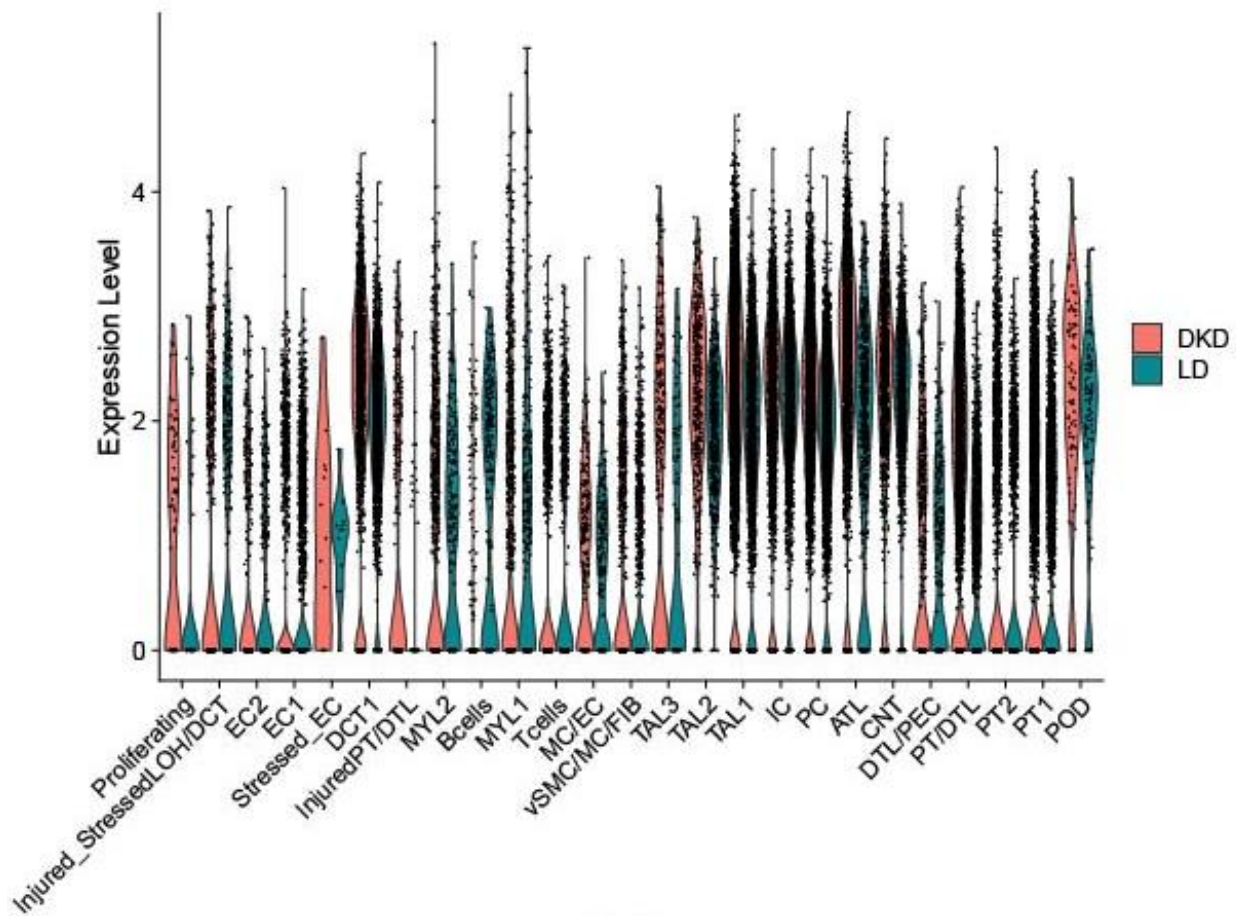

**Figure S4. Cathepsin D, Akita mouse model studies.** Cathepsin D enzyme activity in the urine of 8 and 16-weeks (A) old mice but not in the plasma (B) of 16-weeks old mice. (C) Representative microphotographs of immunofluorescent staining of aquaporin 1 (green) and cathepsin D (red) in the kidney of non-diabetic control (upper panel) and Akita mice (lower panel). White arrows indicate cathepsin D localization in the glomeruli and yellow arrows indicate cathepsin D localization in tubules. Scale bar = 30  $\mu$ m. Cathepsin D activity is noted in relative fluorescent units (RFU). Mean  $\pm$  sem. \*\*\*\*  $p < 0.0001$  vs control.

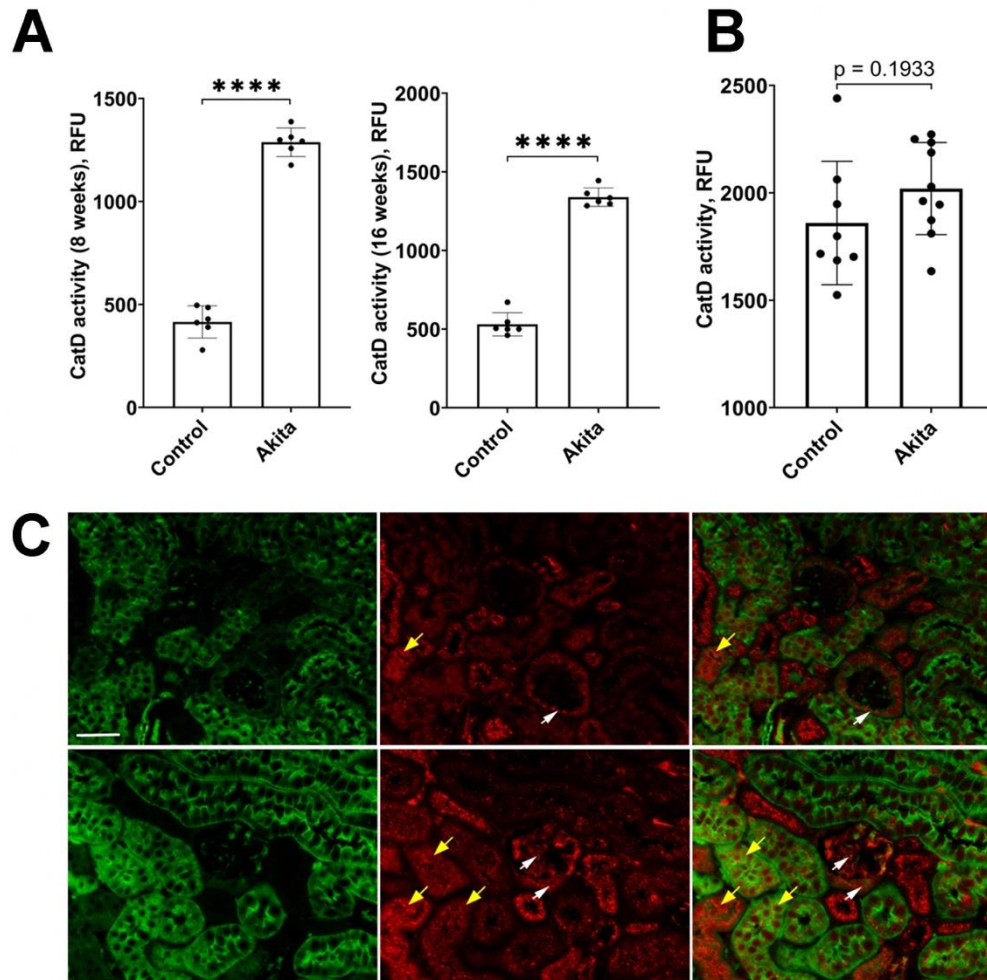

**Figure S5. MCT cell inflammatory/injury marker studies.** Effects of 5.5 mM glucose, 25 mM glucose, 100 ug/mL control BSA, 200 ug/mL control BSA, 100 ug/mL AGE-BSA, and 200ug AGE-BSA on MCT cell media concentrations of IL-1 (A), IL-6 (B), and KIM-1 (C). \*  $p < 0.05$ , \*\*  $p < 0.01$ , \*\*\*  $p < 0.001$ , \*\*\*\*  $p < 0.0001$

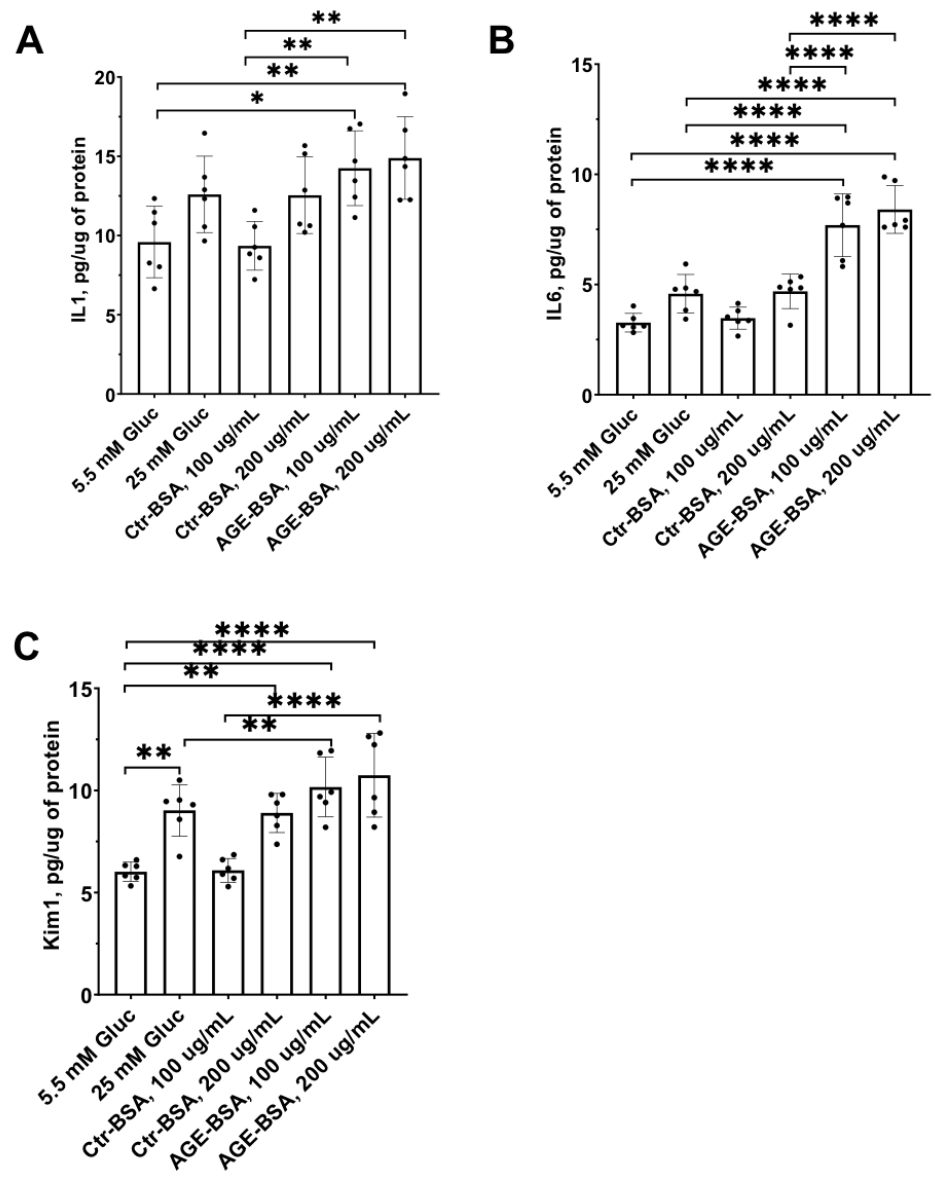

Supplement: Supplementary file 1 [file 1]
