# Supplementary material
Source: publisher figshare collection journal article supplement (https://diabetesjournals.figshare.com/articles/dataset/_/19337210)
Supplement: Supplementary file 2 [file 1]

## Kidney Precision Medicine Project Collaborator List

| Name                  | Site                            |
|-----------------------|---------------------------------|
| Richard Knight        | AAKP                            |
| Stewart H. Lecker     | Beth Israel Deaconess           |
| Isaac Stillman        | Beth Israel Deaconess           |
| Steve Bogen           | Boston Cell Standards           |
| Afolarin A. Amodu     | Boston Medical Center           |
| Titlayo Ilori         | Boston Medical Center           |
| Shana Maikhor         | Boston Medical Center           |
| Insa Schmidt          | Boston Medical Center           |
| Guanghao Yu           | Boston Medical Center           |
| Laurence H. Beck      | Boston University               |
| Ashish Verma          | Boston University               |
| Joel M. Henderson     | Boston University               |
| Ingrid Onul           | Boston University               |
| Sushrut Waikar        | Brigham & Women's Hospital      |
| Gearoid M. McMahon    | Brigham & Women's Hospital      |
| Astrid Weins          | Brigham & Women's Hospital      |
| Mia R. Colona         | Brigham & Women's Hospital      |
| M. Todd Valerius      | Brigham & Women's Hospital      |
| Nir Hacohen           | Broad Institute                 |
| Paul J. Hoover        | Broad Institute                 |
| Anna Greka            | Broad Institute                 |
| Jamie L. Marshall     | Broad Institute                 |
| Mark Aulisio          | Case Western Reserve            |
| Yijiang M. Chen       | Case Western Reserve            |
| Andrew Janowczyk      | Case Western Reserve            |
| Catherine Jayapandian | Case Western Reserve            |
| Vidya S. Viswanathan  | Case Western Reserve            |
| William S. Bush       | Case Western Reserve University |
| Dana C. Crawford      | Case Western Reserve University |
| Anant Madabhushi      | Case Western Reserve University |
| John O'toole          | Cleveland Clinic                |
| Emilio Poggio         | Cleveland Clinic                |
| John Sedor            | Cleveland Clinic                |
| Leslie Cooperman      | Cleveland Clinic                |
| Stacey Jolly          | Cleveland Clinic                |

|                          |                                       |
|--------------------------|---------------------------------------|
| Leal Herlitz             | Cleveland Clinic                      |
| Jane Nguyen              | Cleveland Clinic                      |
| Agustin Gonzalez-Vicente | Cleveland Clinic                      |
| Ellen Palmer             | Cleveland Clinic                      |
| Dianna Sendrey           | Cleveland Clinic                      |
| Jonathan Taliercio       | Cleveland Clinic                      |
| Kassandra Spates-Harden  | Cleveland Clinic                      |
| Lakeshia Bush            | Cleveland Clinic                      |
| Carissa Vinovskis        | Colorado                              |
| Petter M. Bjornstad      | Colorado                              |
| Laura Pyle               | Colorado                              |
| Paul Appelbaum           | Columbia University                   |
| Jonathan M. Barasch      | Columbia University                   |
| Andrew S. Bomback        | Columbia University                   |
| Vivette D. D'Agati       | Columbia University                   |
| Krzysztof Koryluk        | Columbia University                   |
| Karla Mehl               | Columbia University                   |
| Pietro A. Canetta        | Columbia University                   |
| Ning Shang               | Columbia University                   |
| Olivia Balderes          | Columbia University                   |
| Satoru Kudose            | Columbia University                   |
| Laura Barisoni           | Duke University                       |
| Theodore Alexandrov      | European Molecular Biology Laboratory |
| Helmut Rennke            | Harvard University                    |
| Tarek M. El-Achkar       | Indiana University                    |
| Yinghua Cheng            | Indiana University                    |
| Pierre C. Dagher         | Indiana University                    |
| Michael T. Eadon         | Indiana University                    |
| Kenneth W. Dunn          | Indiana University                    |
| Katherine J. Kelly       | Indiana University                    |
| Timothy A. Sutton        | Indiana University                    |
| Daria Barwinska          | Indiana University                    |
| Michael J. Ferkowicz     | Indiana University                    |
| Seth Winfree             | Indiana University                    |
| Sharon Bledsoe           | Indiana University                    |
| Marcelino Rivera         | Indiana University                    |
| James C. Williams, Jr.   | Indiana University                    |
| Ricardo Melo Ferreira    | Indiana University                    |

|                            |                                         |
|----------------------------|-----------------------------------------|
| Katy Borner                | Indiana University                      |
| Andreas Bueckle            | Indiana University                      |
| Bruce W. Herr              | Indiana University                      |
| Ellen M. Quardokus         | Indiana University                      |
| Elizabeth Record           | Indiana University                      |
| Jing Su                    | Indiana University                      |
| Debora Gisch               | Indiana University                      |
| Stephanie Wofford          | Indiana University                      |
| Yashvardhan Jain           | Indiana University - Bloomington        |
| Chirag R. Parikh           | Johns Hopkins University                |
| Celia P. Corona-Villalobos | Johns Hopkins University                |
| Steven Menez               | Johns Hopkins University                |
| Avi Rosenberg              | Johns Hopkins University                |
| Yumeng Wen                 | Johns Hopkins University                |
| Alan Xu                    | Johns Hopkins University                |
| Camille Johansen           | Joslin                                  |
| Sylvia E. Rosas            | Joslin Diabetes Center                  |
| Neil Roy                   | Joslin Diabetes Center                  |
| Mark Williams              | Joslin Diabetes Center                  |
| Jennifer Sun               | Joslin Diabetes Center                  |
| Sarah Chen                 | Joslin Diabetes Center                  |
| Isabel Donohoe             | Joslin Diabetes Center                  |
| Evren U. Azeloglu          | Mount Sinai                             |
| Cijang He                  | Mount Sinai                             |
| Ravi Iyengar               | Mount Sinai                             |
| Jens Hansen                | Mount Sinai                             |
| Yuguang Xiong              | Mount Sinai                             |
| Pottumarthi Prasad         | Northshore                              |
| Anand Srivastava           | Northwestern                            |
| Brad Rovin                 | Ohio State University                   |
| Samir Parikh               | Ohio State University                   |
| John P. Shapiro            | Ohio State University                   |
| Sethu M. Madhavan          | Ohio State University                   |
| Christopher R. Anderton    | Pacific Northwest National Laboratories |
| Ljiljana Pasa-Tolic        | Pacific Northwest National Laboratories |
| Dusan Velickovic           | Pacific Northwest National Laboratories |
| Jessica Lukowski           | Pacific Northwest National Laboratories |
| George (Holt) Oliver       | Parkland                                |

|                       |                                         |
|-----------------------|-----------------------------------------|
| Joseph Ardayfio       | KPMP Patient Partner                    |
| Jack Bebiak           | KPMP Patient Partner                    |
| Keith Brown           | KPMP Patient Partner                    |
| Catherine E. Campbell | KPMP Patient Partner                    |
| John Saul             | KPMP Patient Partner                    |
| Anna Shpigel          | KPMP Patient Partner                    |
| Christy Stutzke       | KPMP Patient Partner                    |
| Robert Koewler        | KPMP Patient Partner                    |
| Taneisha Campbell     | KPMP Patient Partner                    |
| Lynda Hayashi         | KPMP Patient Partner                    |
| Nichole Jefferson     | KPMP Patient Partner                    |
| Glenda V. Roberts     | KPMP Patient Partner                    |
| Roy Pinkeney          | KPMP Patient Partner                    |
| Olga Troyanskaya      | Princeton University                    |
| Rachel Sealfon        | Princeton University                    |
| Aaron Wong            | Princeton University                    |
| Katherine R. Tuttle   | Providence Health                       |
| Ari Pollack           | Seattle Children's Hospital             |
| Yury Goltsev          | Stanford University                     |
| Nicholas Lucarelli    | SUNY Buffalo                            |
| Pinaki Sarder         | SUNY Buffalo                            |
| Brandon Ginley        | SUNY Buffalo                            |
| Brendon Lutnick       | SUNY Buffalo                            |
| Kun Zhang             | UC San Diego                            |
| Blue B. Lake          | UC San Diego                            |
| Zoltan G. Laszik      | UC San Francisco                        |
| Garry Nolan           | UC San Francisco                        |
| Patrick Boada         | UC San Francisco                        |
| Minnie Sarwal         | UCSF                                    |
| Kavya Anjani          | UCSF                                    |
| Tara Sigdel           | University of California, San Francisco |
| Tariq Mukatash        | University of California, San Francisco |
| Paul J. Lee           | University of Cincinnati                |
| Rita R. Alloway       | University of Cincinnati                |
| E. Steve Woodle       | University of Cincinnati                |
| Ashley R. Burg        | University of Cincinnati                |
| Adele Rike            | University of Cincinnati                |
| Tiffany Shi           | University of Cincinnati                |

|                     |                          |
|---------------------|--------------------------|
| Heather Ascani      | University of Michigan   |
| Ulysses GJ. Balis   | University of Michigan   |
| Jeffrey B. Hodgins  | University of Michigan   |
| Matthias Kretzler   | University of Michigan   |
| Chrysta Lienczewski | University of Michigan   |
| Laura H. Mariani    | University of Michigan   |
| Rajasree Menon      | University of Michigan   |
| Becky Steck         | University of Michigan   |
| Yongqun He          | University of Michigan   |
| Edgar Otto          | University of Michigan   |
| Jennifer Schaub     | University of Michigan   |
| Victoria M. Blanc   | University of Michigan   |
| Sean Eddy           | University of Michigan   |
| Ninive C. Conser    | University of Michigan   |
| Jinghui Luo         | University of Michigan   |
| Renee Frey          | University of Michigan   |
| Paul M. Palevsky    | University of Pittsburgh |
| Matthew Rosengart   | University of Pittsburgh |
| John A. Kellum      | University of Pittsburgh |
| Daniel E. Hall      | University of Pittsburgh |
| Parmjeet Randhawa   | University of Pittsburgh |
| Mitchell Tublin     | University of Pittsburgh |
| Raghavan Murugan    | University of Pittsburgh |
| Michele M. Elder    | University of Pittsburgh |
| James Winters       | University of Pittsburgh |
| Matthew Gilliam     | University of Pittsburgh |
| Tina Vita           | University of Pittsburgh |
| Filitsa Bender      | University of Pittsburgh |
| Roderick Tan        | University of Pittsburgh |
| Adam Burgess        | University of Pittsburgh |
| Charles E. Alpers   | University of Washington |
| Kristina N. Blank   | University of Washington |
| Jonas Carson        | University of Washington |
| Ian H. De Boer      | University of Washington |
| Ashveena L. Dighe   | University of Washington |
| Jonathan Himmelfarb | University of Washington |
| Sean D. Mooney      | University of Washington |
| Stuart Shankland    | University of Washington |

|                        |                          |
|------------------------|--------------------------|
| Kayleen Williams       | University of Washington |
| Christopher Park       | University of Washington |
| Frederick Dowd         | University of Washington |
| Robyn L. McClelland    | University of Washington |
| Stephen Daniel         | University of Washington |
| Andrew N. Hoofnagle    | University of Washington |
| Adam Wilcox            | University of Washington |
| Stephanie M. Grewenow  | University of Washington |
| Ashley Berglund        | University of Washington |
| Christine Limonte      | University of Washington |
| Kasra Rezaei           | University of Washington |
| Ruikang Wang           | University of Washington |
| Jamie Snyder           | University of Washington |
| Brooke Berry           | University of Washington |
| Yunbi Nam              | University of Washington |
| Natalya Sarkisova      | University of Washington |
| Shweta Bansal          | UT Health San Antonio    |
| Kumar Sharma           | UT Health San Antonio    |
| Manjeri Venkatachalam  | UT Health San Antonio    |
| Guanshi Zhang          | UT Health San Antonio    |
| Annapurna Pamreddy     | UT Health San Antonio    |
| Hongping Ye            | UT Health San Antonio    |
| Richard Montellano     | UT Health San Antonio    |
| Robert D. Toto         | UT Southwestern          |
| Miguel Vazquez         | UT Southwestern          |
| Simon C. Lee           | UT Southwestern          |
| R. Tyler Miller        | UT Southwestern          |
| Orson W. Moe           | UT Southwestern          |
| Jose Torrealba         | UT Southwestern          |
| Nancy Wang             | UT Southwestern          |
| Asra Kermani           | UT Southwestern          |
| Kamalanathan Sambandam | UT Southwestern          |
| Harold Park            | UT Southwestern          |
| S. Susan Hedayati      | UT Southwestern          |
| Christopher Y. Lu      | UT Southwestern          |
| Natasha Wen            | UT Southwestern          |
| Jiten Patel            | UT Southwestern          |
| Anil Pillai            | UT Southwestern          |

|                        |                                 |
|------------------------|---------------------------------|
| Dianbo Zhang           | UT Southwestern                 |
| Mujeeb Basit           | UT Southwestern                 |
| Allen H. Hendricks     | UT Southwestern                 |
| Richard M. Caprioli    | Vanderbilt                      |
| Nathan Patterson       | Vanderbilt                      |
| Kavya Sharman          | Vanderbilt                      |
| Jeffrey M. Spraggins   | Vanderbilt                      |
| Raf Van de Plas        | Vanderbilt                      |
| Sanjay Jain            | Washington University St. Louis |
| Anitha Vijayan         | Washington University St. Louis |
| Joseph P. Gaut         | Washington University St. Louis |
| Jeanine Basta          | Washington University St. Louis |
| Sabine M. Diettman     | Washington University St. Louis |
| Michael I. Rauchman    | Washington University St. Louis |
| Dennis Moledina        | Yale University                 |
| Francis P. Wilson      | Yale University                 |
| Ugochukwu Ugwuowo      | Yale University                 |
| Tanima Arora           | Yale University                 |
| Melissa M. Shaw        | Yale University                 |
| Lloyd G. Cantley       | Yale University                 |
| Vijaykumar R. Kakade   | Yale University                 |
| Angela Victoria-Castro | Yale University                 |
